# Supplementary material
Source: Royal Society of Chemistry journal article supplement (doi:10.1039/d6qo00344c)
Supplement: d6qo00344c1.pdf [file d6qo00344c1.pdf]

# A Furan Prism Cage: Synthesis, Guest Recognition, and Applications in Constructing Charge-Transfer Cocrystals.

Yongwei Qian<sup>†</sup>, Shengyang Huang<sup>†</sup>, Shengwen Li<sup>†</sup>, Zhenzhuo, Liu, Yang Liu, Guangcheng  
Wu, Yingchun Liu, Hua Tang, Jiyong Liu, Bin Sun\*, Ming Li and Hao Li(s)\*

## Supporting Information

### Table of Contents

|                                                                        |           |
|------------------------------------------------------------------------|-----------|
| <b>1. Materials and General Methods .....</b>                          | <b>2</b>  |
| <b>2. Synthetic Procedures. ....</b>                                   | <b>3</b>  |
| <b>3. Characterization of ligands and cages.....</b>                   | <b>5</b>  |
| <b>3. Host-guest recognition studies of FPC. ....</b>                  | <b>10</b> |
| <b>4. Photophysical Properties of the Charge Transfer Systems.....</b> | <b>22</b> |
| <b>5. Single crystal information. ....</b>                             | <b>33</b> |
| <b>6. Job-Plot Analysis of Typical Host-Guest complexes.....</b>       | <b>46</b> |
| <b>7. Vapochromic behaviors of complex G1C FPC.....</b>                | <b>51</b> |
| <b>8. Reference.....</b>                                               | <b>52</b> |

## 1. Materials and General Methods

All reagents and solvents were purchased from commercial sources and used without further purification. Manipulations were performed under a normal laboratory atmosphere unless otherwise noted. The compound 1,3,5-tri(furan-2-yl) benzene (**5**)<sup>1</sup> were prepared according to the literature procedures. Thin layer chromatography (TLC) and column chromatography were operated using silica gel 60F254 and silica gel 60F (Merck 9385, 0.040 – 0.063 mm), respectively. Nuclear magnetic resonance (NMR) spectra were recorded on Bruker AVANCE III 400/500 or Agilent DD2 600 spectrometers, with working frequencies of 400/500/600 MHz for <sup>1</sup>H and 100/125/150 MHz for <sup>13</sup>C, respectively. Chemical shifts are reported in ppm relative to the residual internal non-deuterated solvent signals (CDCl<sub>3</sub>:  $\delta$  = 7.26 ppm,). NOESY spectra were acquired at 298 K with mixing time of 180 ms. ROESY spectra were recorded at 298 K with mixing time of 200 ms. High-resolution mass spectra (HR-MS) were measured on a Fourier transform ion cyclotron resonance mass spectrometry (FT-ICR MS). Maldi-Tof-MS was measured by using Bruker ultraflex extreme. Thermal gravimetric analysis was measured by using SDT Q600X-ray crystallographic data were collected using a Bruker D8 Venture diffractometer. The UV-vis spectroscopy was carried by Uv-2600. Fluorescence spectra were measured by using FLS1000. The solid-state spectra were measured by using Shimadzu UV-VIS-NIR (UV3600Plus+UV2700). X-ray Powder Diffraction (XRD) tests were measured by using Bruker D8 Discover. All the DFT calculations were performed with ORCA program. For geometry optimization and frequency analysis we adopted the hybrid functional by using the B3LYP with DFT-D3BJ dispersion correction. During geometry optimization we used the valence triple- $\zeta$  basis set def-TZVP for all atoms. To refine the computed orbital energy, single point calculations were performed using the range-separated hybrid functional  $\omega$ B97M-V and the def2-TZVPP basis set. Electrostatic potential figures were generated using Multiwfn to produce cube files and visualized with VMDS<sup>2</sup>.

## 2. Synthetic Procedures.

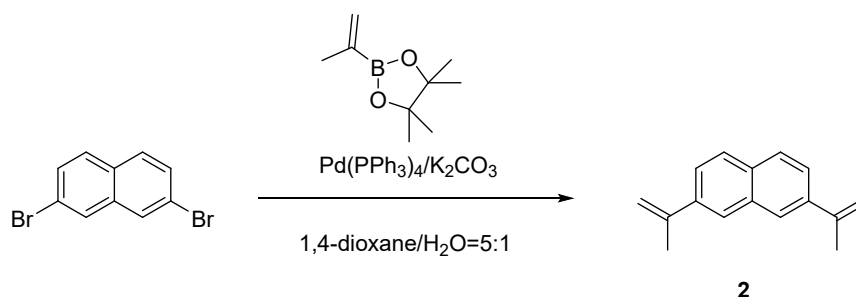

### Scheme S1. Synthesis of compound **2**.

2,7-Dibromonaphthalene (1.0 g, 1.0 equiv), isopropenylboronic acid pinacol ester (1.4 g, 2.2 equiv), and  $\text{K}_2\text{CO}_3$  (2.4 g, 5.0 equiv) were dissolved in 1,4-dioxane (30 mL) and  $\text{H}_2\text{O}$  (6 mL) in a 100 mL three-neck round-bottom flask. After degassed with  $\text{N}_2$  three times, tetrakis(triphenylphosphine) palladium (0.2 g, 0.05 equiv) was added under  $\text{N}_2$ , and then the mixture was heated at 85 °C under  $\text{N}_2$  overnight. Upon completion (monitored by TLC, at 16 h), the mixture was cooled, quenched with  $\text{H}_2\text{O}$  (50 mL), and extracted with EtOAc ( $3 \times 20$  mL). The combined organic layers were dried through anhydrous  $\text{Na}_2\text{SO}_4$  and concentrated under reduced pressure. Purification by column chromatography (EtOAc / petroleum ether = 1 / 100, v/v) afforded compound **2** as a white solid (0.65 g, 89 %).  $^1\text{H}$  NMR (400 MHz,  $\text{CDCl}_3$ ):  $\delta$  7.87 (d,  $J = 1.8$  Hz, 2H), 7.77 (d,  $J = 8.6$  Hz, 2H), 7.66 (dd,  $J = 8.5, 1.8$  Hz, 2H), 5.55 (s, 2H), 5.21 (s, 2H), 2.29 (s, 6H).  $^{13}\text{C}$  NMR (100 MHz,  $\text{CDCl}_3$ ):  $\delta$  145.2, 142.5, 136.5, 130.1, 125.5, 114.6, 21.7. HR-MS-ESI: calculated: 208.1252; found:  $[\text{M}+\text{H}]^+$  209.1322.

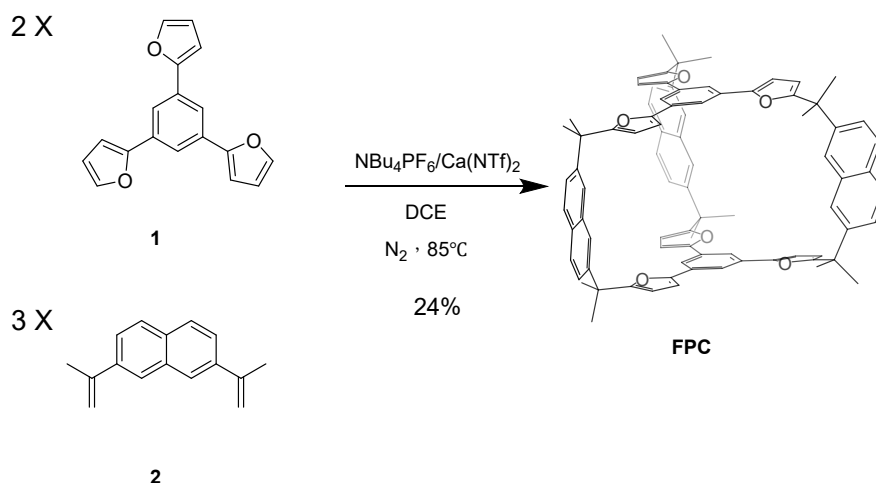

### Scheme S2. Synthesis of FPC.

2,7-Diisopropenylnaphthalene (**2**, 250 mg, 1.6 equiv), 1,3,5-tris(2-furyl)benzene (**1**, 200 mg, 1.0 equiv), tetrabutylammonium hexafluorophosphate (70 mg, 0.25 equiv), and calcium bis(trifluoromethanesulfonyl)imide (108 mg, 0.25 equiv) were dissolved in 1,2-dichloroethane (50 mL) in a 100 mL two-neck round-bottom flask. The reaction mixture was degassed with  $\text{N}_2$  (three cycles), and then heated at 85 °C in an oil bath overnight. After completion (monitored by TLC), the mixture was cooled to room temperature, quenched with  $\text{H}_2\text{O}$  (50 mL), and extracted with  $\text{CH}_2\text{Cl}_2$  ( $3 \times 40$  mL). The combined organic layers were dried over anhydrous  $\text{Na}_2\text{SO}_4$ , filtered, and

concentrated under reduced pressure. The crude product was purified by column chromatography to yield the desired compound **FPC** as a white solid (97 mg, 24%). <sup>1</sup>H NMR (500 MHz, CDCl<sub>3</sub>) δ: 7.78 (d, *J* = 8.8 Hz, 6H), 7.58 (d, *J* = 8.7 Hz, 6H), 7.56 (s, 6H), 7.01 (s, 6H), 6.62 (s, 6H), 6.28 (s, 6H), 1.71 (s, 36H). <sup>13</sup>C NMR (125 MHz, CDCl<sub>3</sub>) δ: 161.1, 152.1, 145.9, 133.2, 131.3, 130.6, 127.5, 124.9, 123.1, 116.1, 107.4, 106.0, 40.9, 29.1. HR-MS-ESI:[M + H]<sup>+</sup> calcd for C<sub>78</sub>H<sub>61</sub>O<sub>6</sub>: 1177.533; found: 1177.204.

### 3. Characterization of ligands and cages.

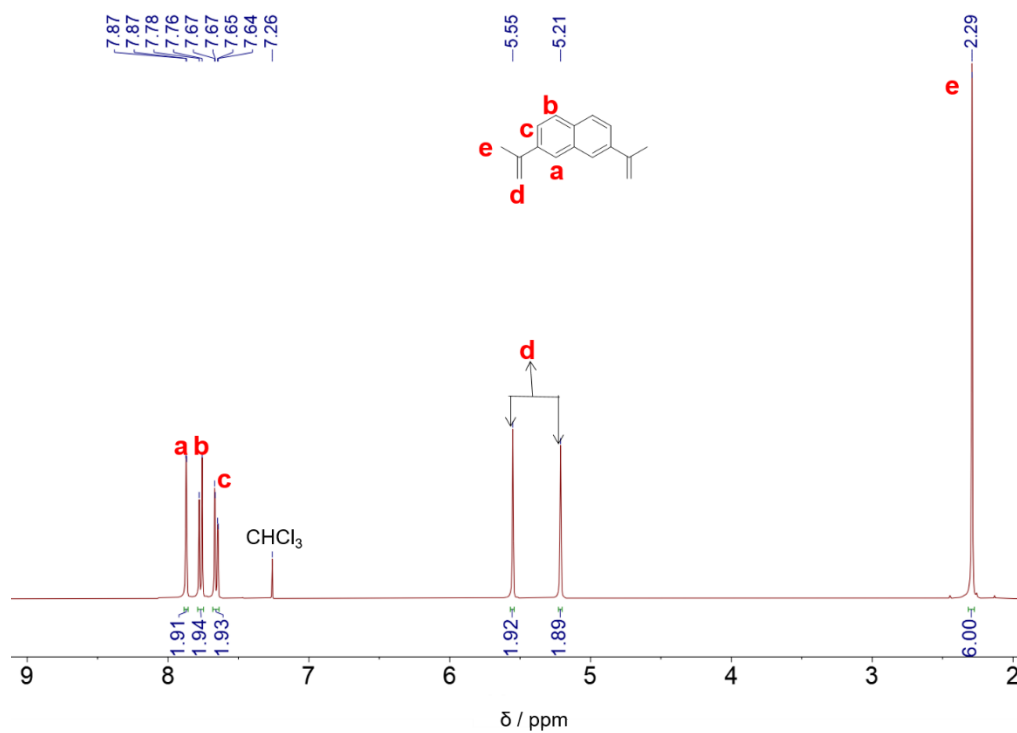

Figure S1. <sup>1</sup>H NMR spectrum (600 MHz, CDCl<sub>3</sub>, 298 K) of **2**.

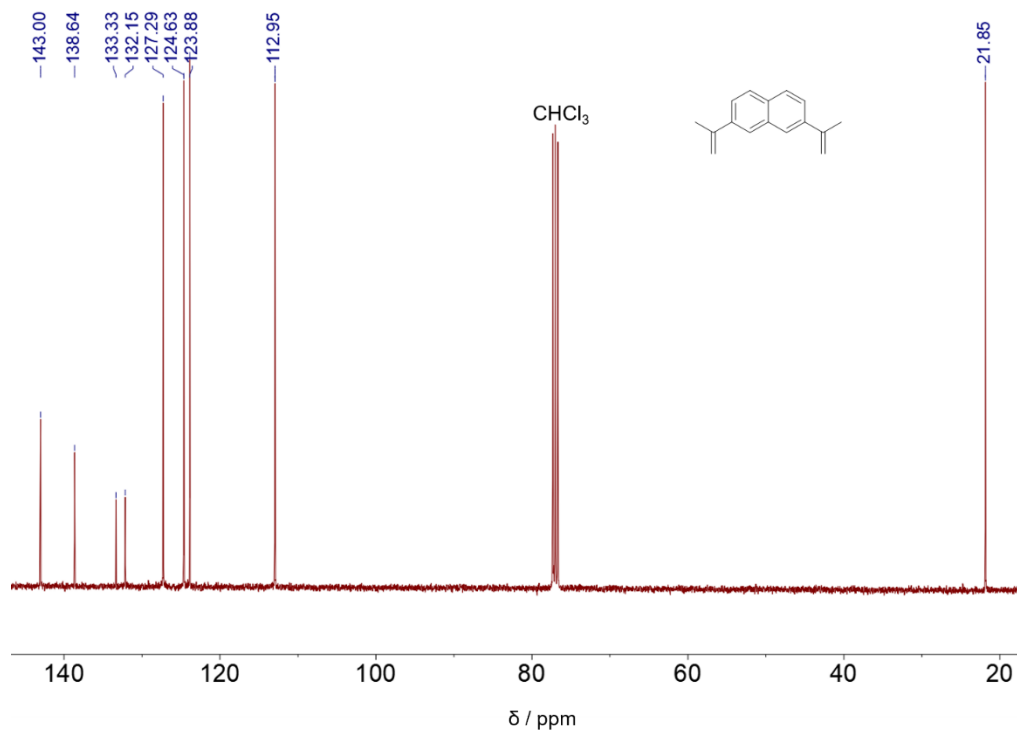

Figure S2. <sup>13</sup>C NMR spectrum (150 MHz, CDCl<sub>3</sub>, 298K) of **2**.

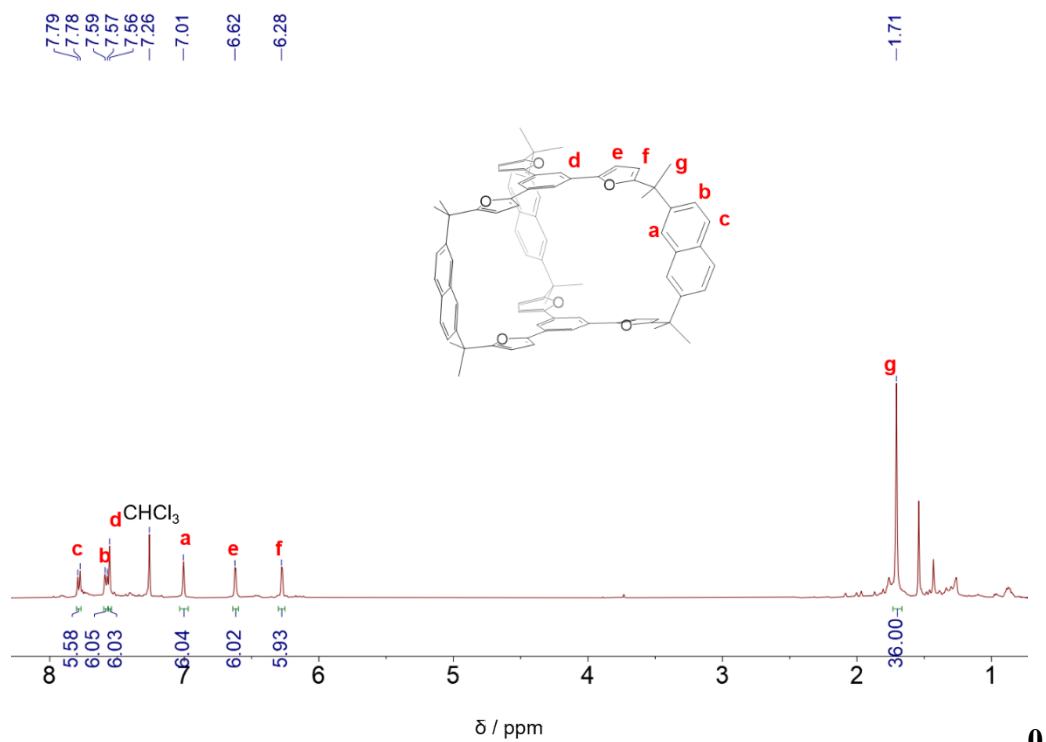

**Figure S3.**  $^1\text{H}$  NMR spectrum (600 MHz,  $\text{CDCl}_3$ , 298 K) of FPC.

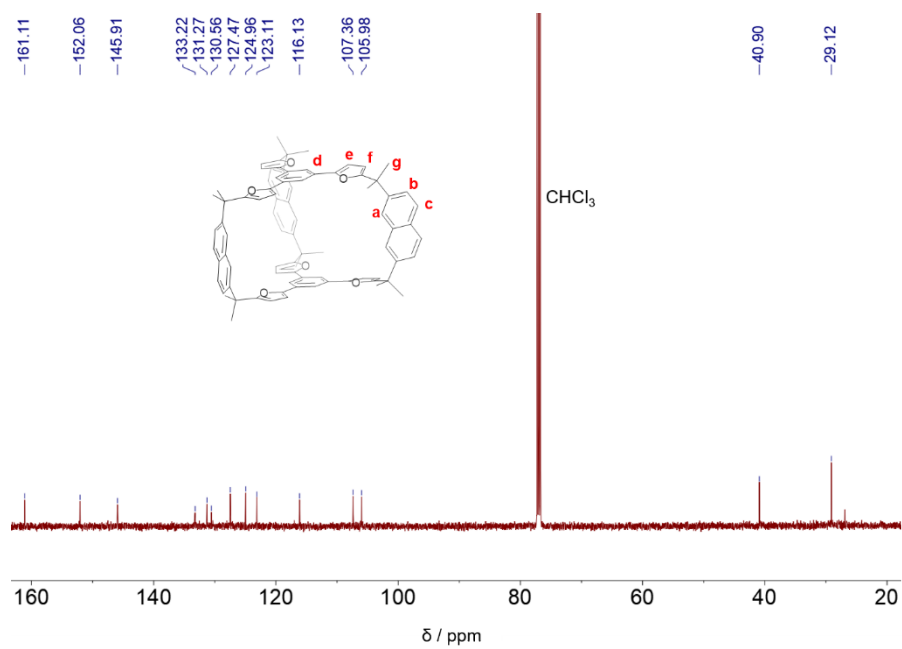

**Figure S4.**  $^{13}\text{C}$  NMR spectrum (150 MHz,  $\text{CDCl}_3$ , 298 K) of FPC.

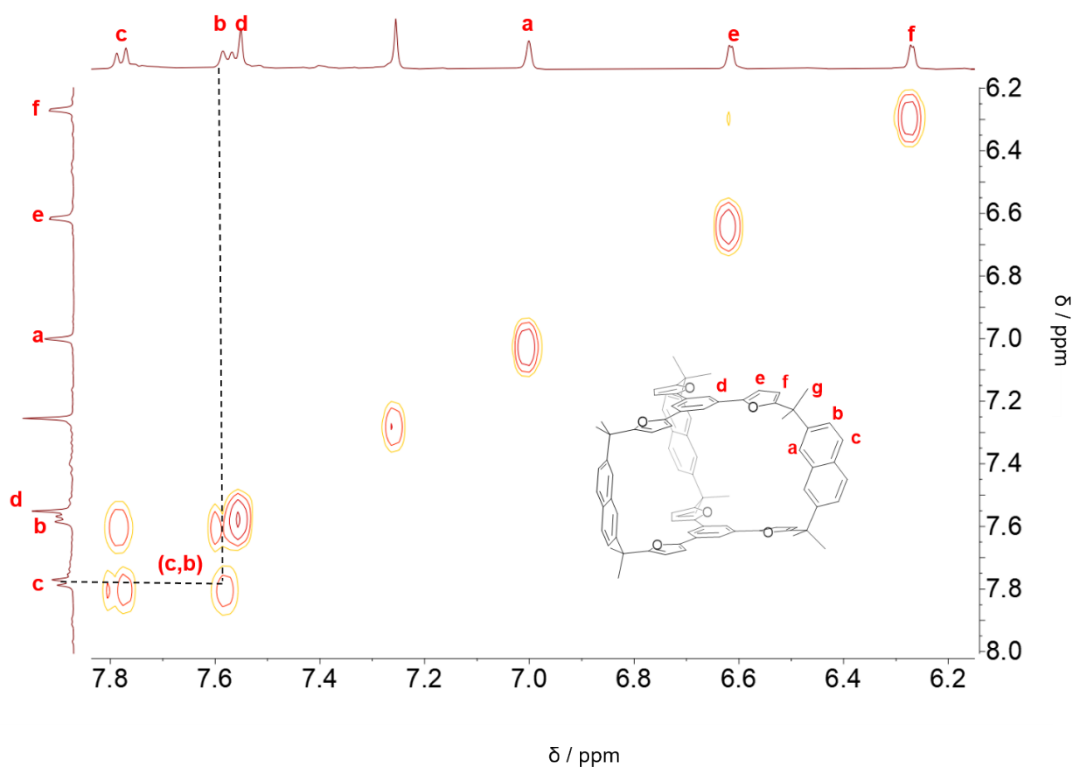

Figure S5.  $^1\text{H}$ - $^1\text{H}$  COSY spectrum (600 MHz,  $\text{CDCl}_3$ , 298 K) of FPC.

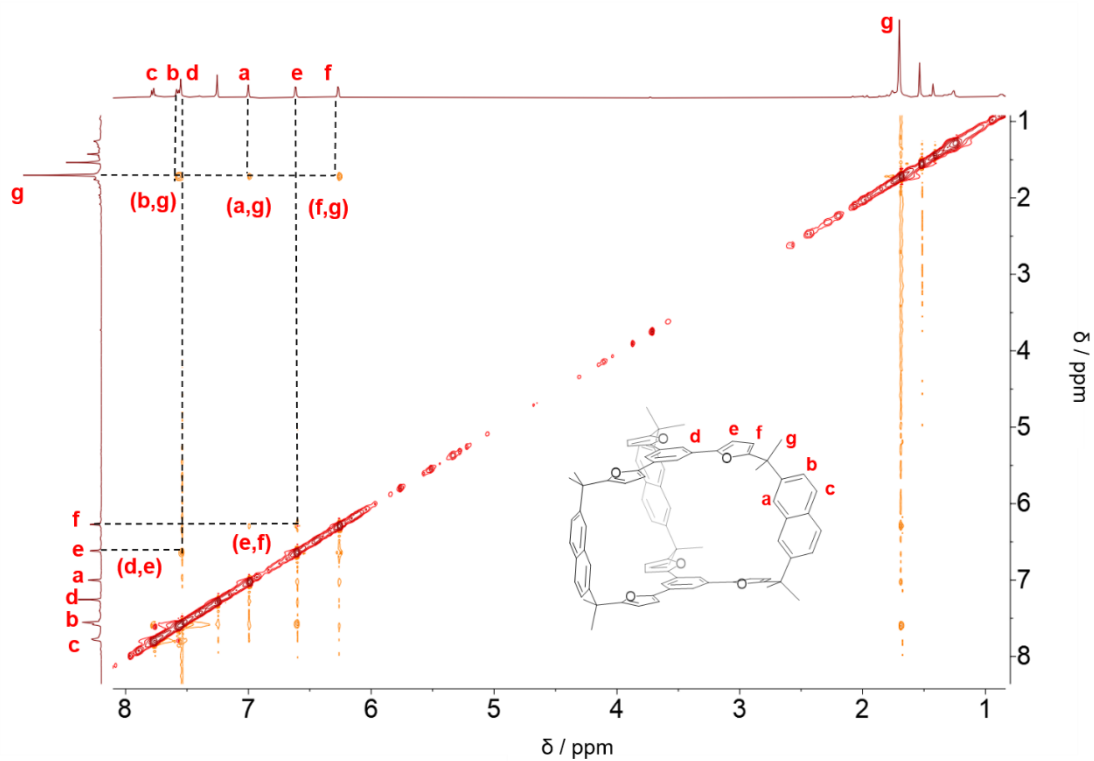

Figure S6.  $^1\text{H}$ - $^1\text{H}$  ROESY spectrum (600 MHz,  $\text{CDCl}_3$ , 298K) of FPC.

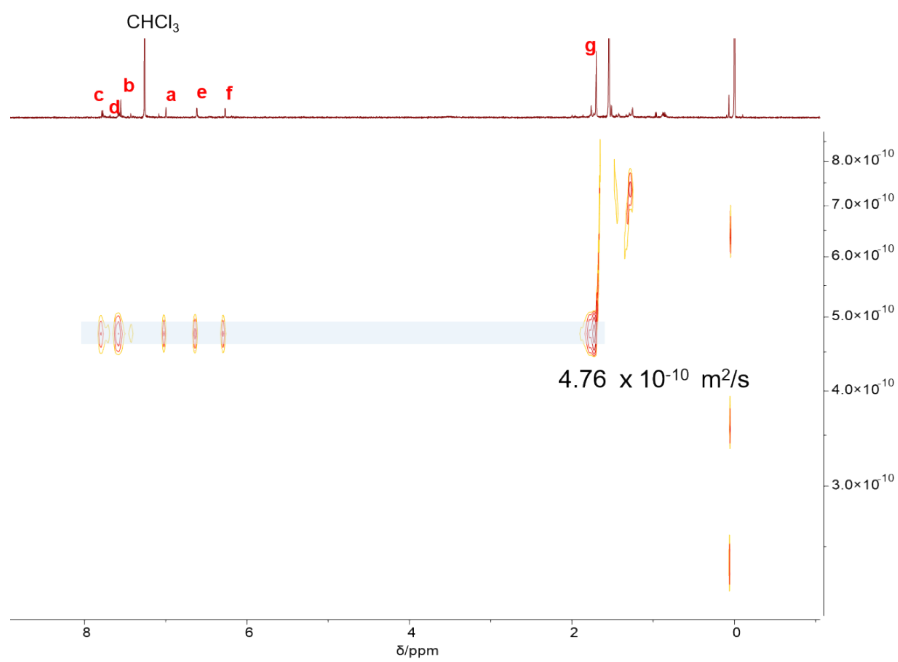

**Figure S7.** DOSY spectrum of FPC (500 MHz, CDCl<sub>3</sub>, 298K).

(a)

### MALDI-TOF Mass Spectrum

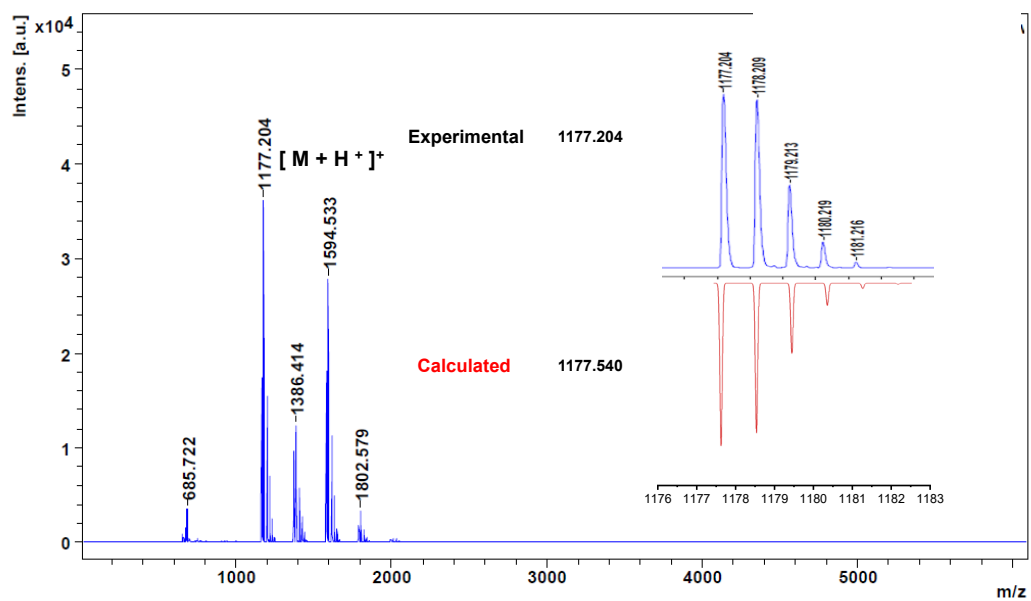

(b)

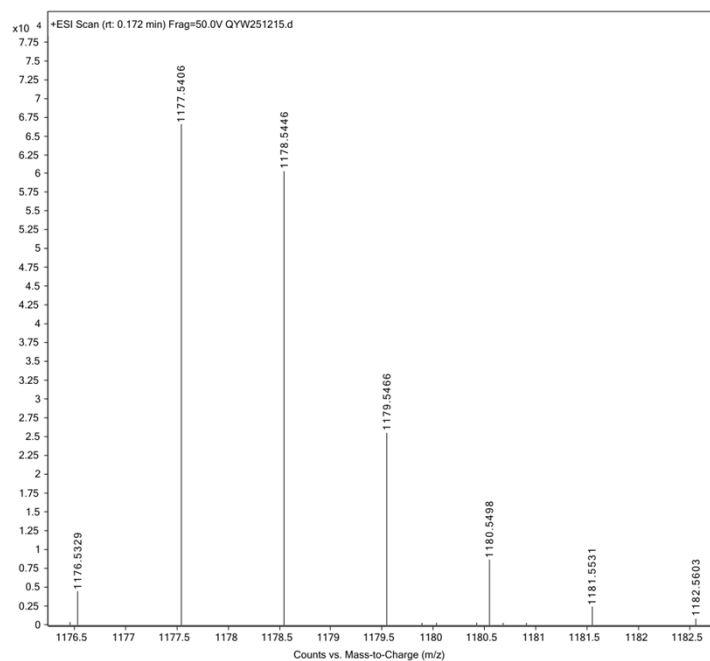

**Figure S8.** (a) Maldi-Tof-MS spectrum of FPC. (b) ESI-MS spectrum of FPC.

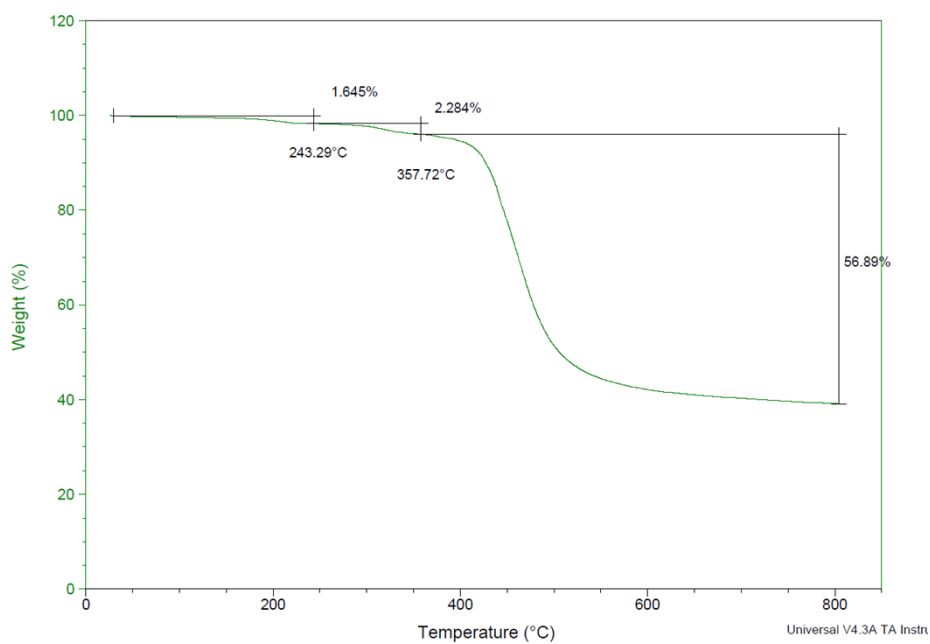

**Figure S9.** Thermogravimetric analysis of FPC.

### 3. Host-guest recognition studies of FPC.

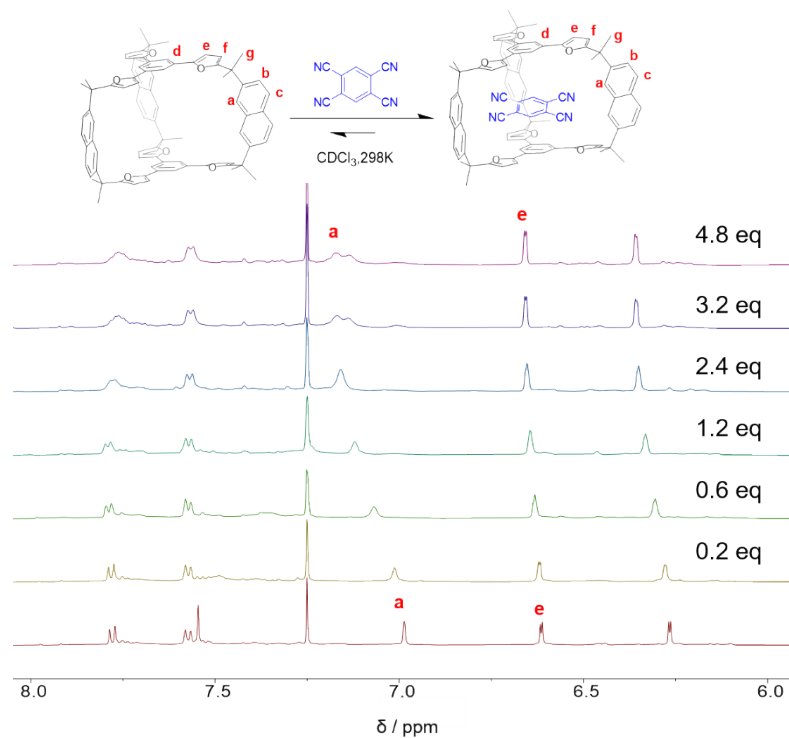

**Figure S10.** Partial  $^1\text{H}$  NMR spectra (600 MHz,  $\text{CDCl}_3$ , 298 K) of **FPC** recorded after addition of different amount of **G1** from 0 equiv. (bottom) to 4.8 equiv. (top) with a constant concentration of **FPC** ( $[\text{C}] = 2.8 \text{ mM}$ ).

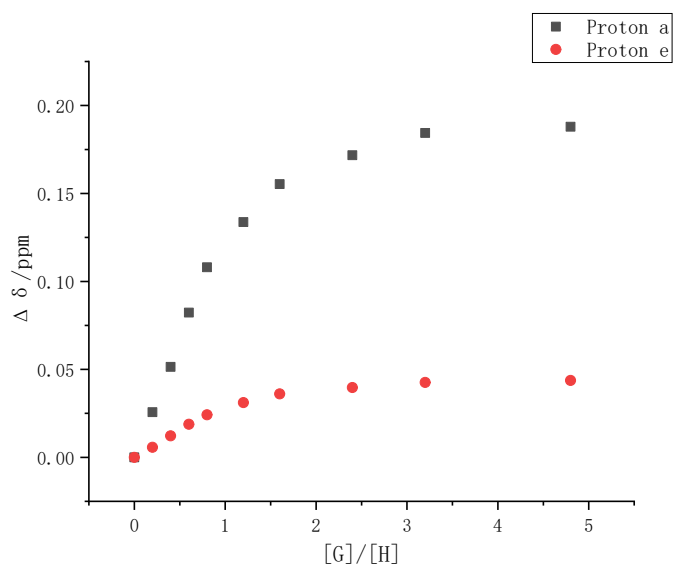

**Figure S11.** Plots of the chemical shift difference ( $\Delta\delta$ ) of the protons a (black) and proton e (red) respectively versus the guest-to-host ratio. The data were fitted with 1:1 binding model and gave  $K_a = (6.0 \pm 0.5) \times 10^2 \text{ M}^{-1}$ .

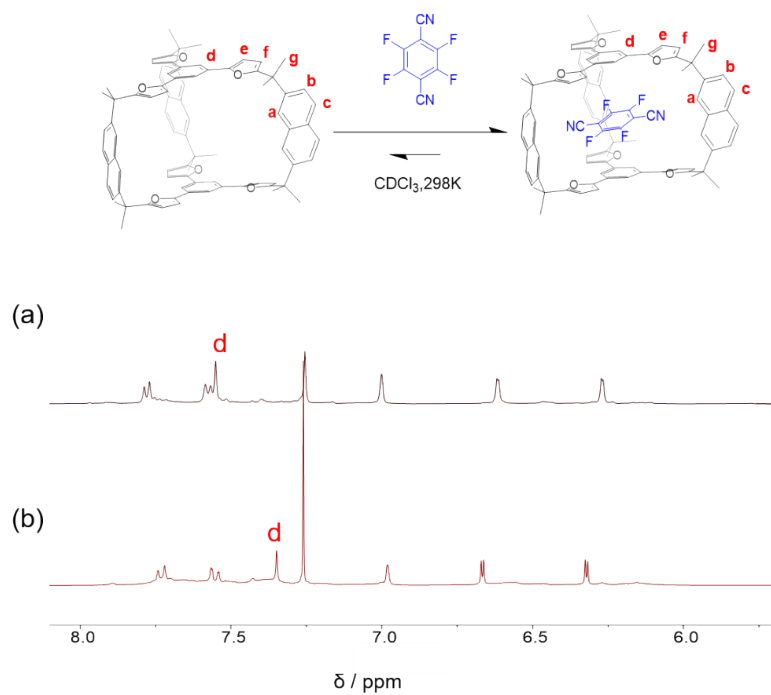

**Figure S12.** Partial <sup>1</sup>H NMR spectra (600 MHz, CDCl<sub>3</sub>, 298 K) of (a) FPC ([C] = 2.8 mM). (b) FPC ([C] = 2.8 mM) after addition of two equivalents G2.

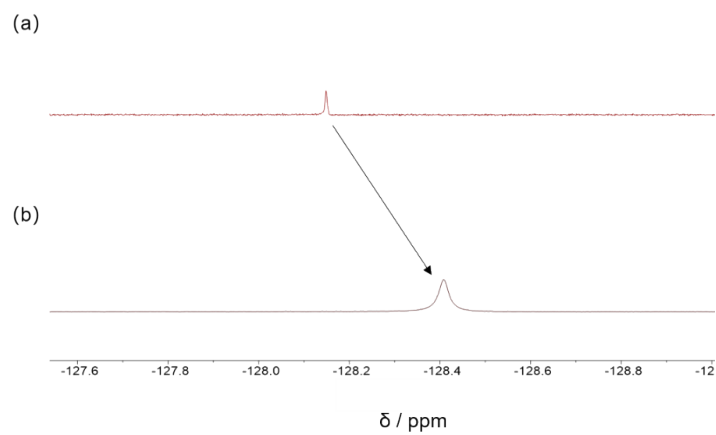

**Figure S13.** Partial <sup>19</sup>F NMR spectra (376 MHz, CDCl<sub>3</sub>, 298 K) of FPC ([C] = 2.8 mM) before (a) and after (b) addition of two equivalents G2.

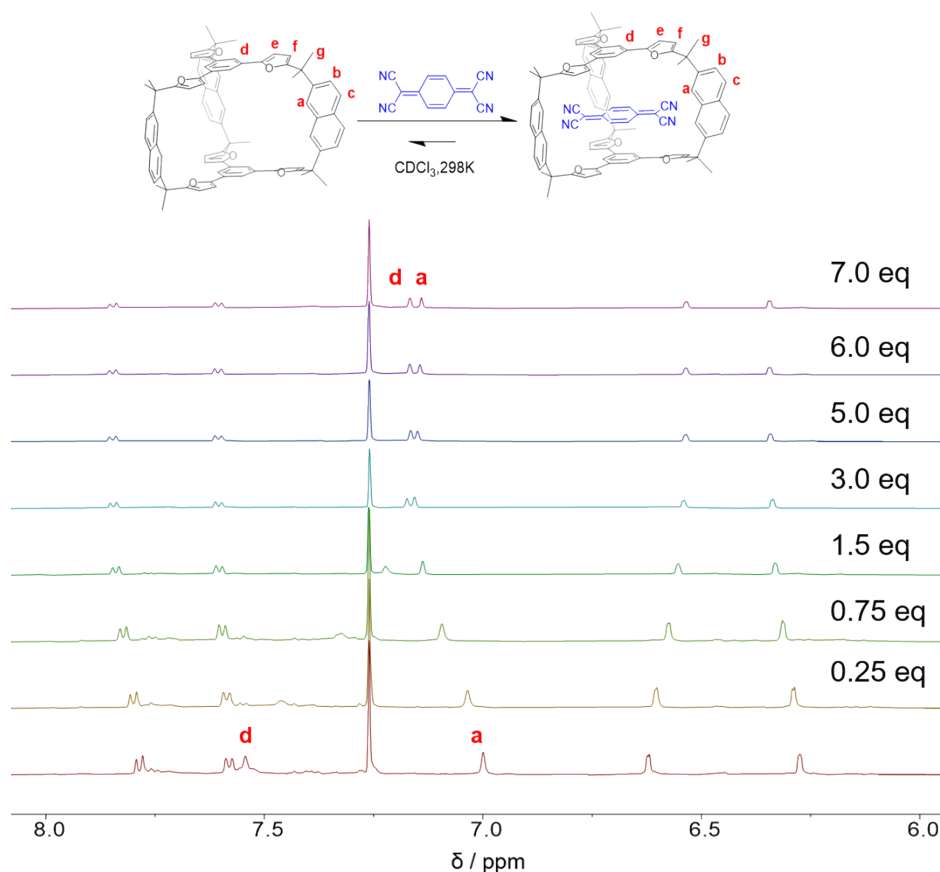

**Figure S14.** Partial  $^1\text{H}$  NMR spectra (600 MHz,  $\text{CDCl}_3$ , 298 K) of FPC recorded after addition of different amount of G3 from 0 equiv. (bottom) to 7.0 equiv. (top) with a constant concentration of FPC ( $[\text{C}] = 2.8 \text{ mM}$ ).

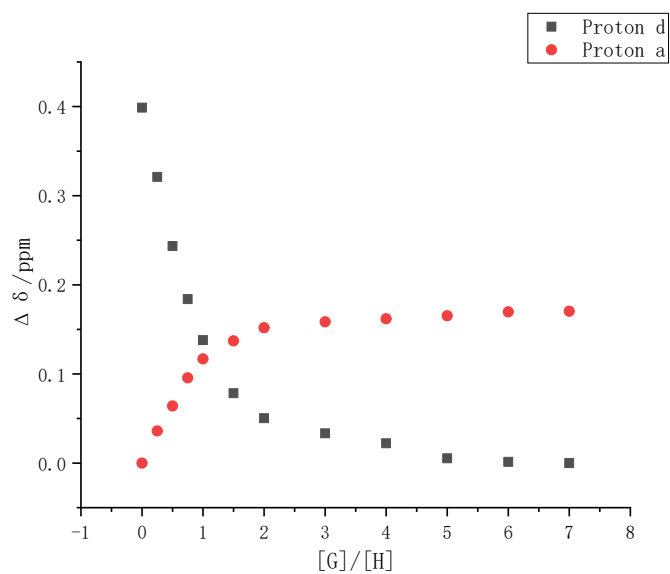

**Figure S15.** Plots of the chemical shift difference ( $\Delta\delta$ ) corresponding to the proton d (black) and proton a (red) respectively versus the guest-to-host ratio. The data were fitted with 1:1 binding model and gave  $K_a = (1.5 \pm 0.1) \times 10^3 \text{ M}^{-1}$ .

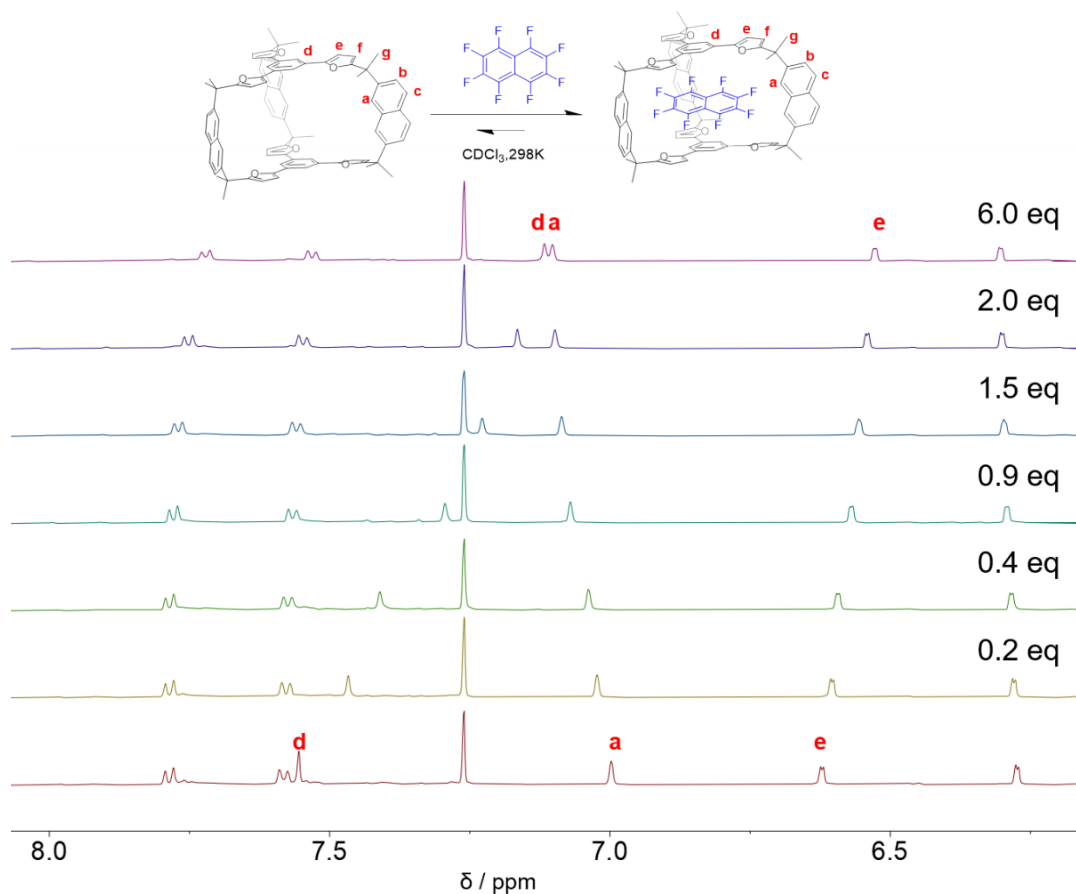

**Figure S16.** Partial  $^1\text{H}$  NMR spectra (600 MHz,  $\text{CDCl}_3$ , 298K) of **FPC** recorded after addition of different amount of **G4** from 0 equiv. (bottom) to 6 equiv. (top) with a constant concentration of **FPC** ( $[\text{C}] = 2.8 \text{ mM}$ ).

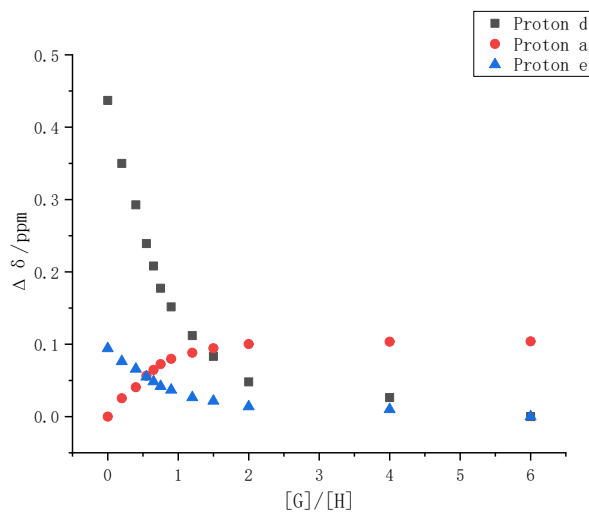

**Figure S17.** Plots of the chemical shift difference ( $\Delta\delta$ ) corresponding to proton a (red), proton d (black) and proton e (blue) versus the guest-to-host ratio. The data were fitted with 1:1 binding model and gave  $K_a = (2.3 \pm 0.2) \times 10^3 \text{ M}^{-1}$ .

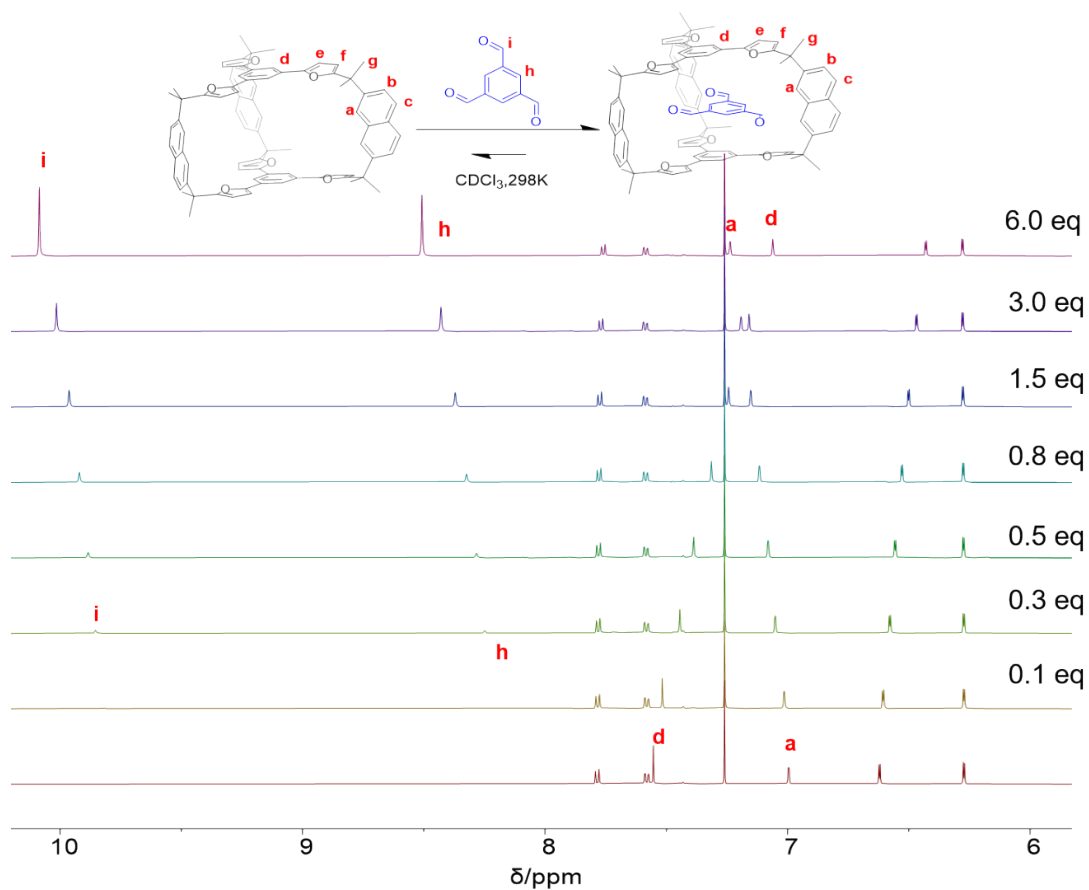

**Figure S18.** Partial  $^1\text{H}$  NMR spectra (600 MHz,  $\text{CDCl}_3$ , 298 K) of FPC recorded after addition of different amount of G5 from 0 equiv. (bottom) to 6.0 equiv. (top) with a constant concentration of FPC ( $[\text{C}] = 2.8 \text{ mM}$ ).

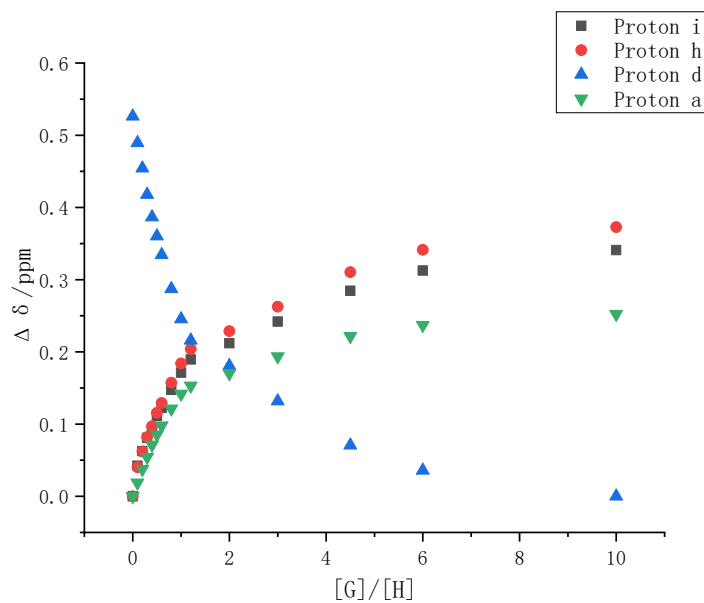

**Figure S19.** Plots of the chemical shift difference ( $\Delta\delta$ ) corresponding to the proton i (black), proton h (red), proton d (blue) and proton a (green) versus the host-guest ratio. The data were fitted with 1:1 binding model and gave  $K_a = (6.6 \pm 0.6) \times 10^2 \text{ M}^{-1}$ .

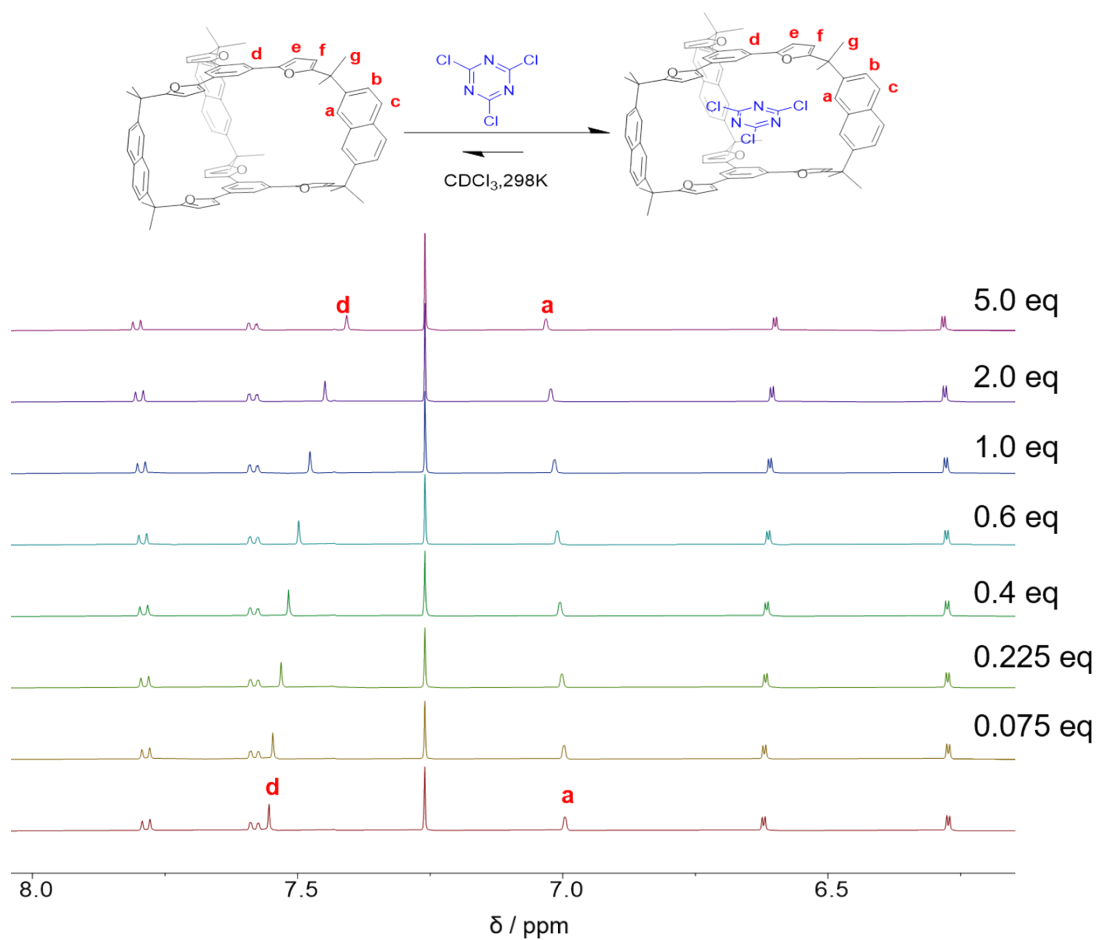

**Figure S20.** Partial  $^1\text{H}$  NMR spectra (600 MHz,  $\text{CDCl}_3$ , 298 K) of **FPC** recorded after addition of different amount of **G6** from 0 equiv. (bottom) to 5.0 equiv. (top) with a constant concentration of **FPC** ( $[\text{C}] = 2.8 \text{ mM}$ ).

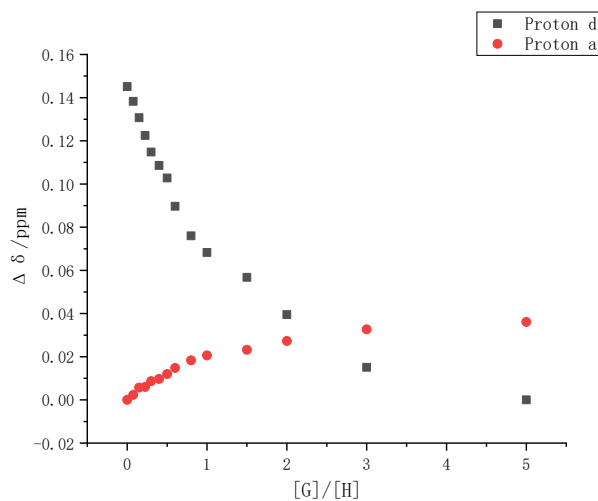

**Figure S21.** Plots of the chemical shift difference ( $\Delta\delta$ ) corresponding to the proton a (red) and proton d (black) versus the host-guest ratio. The data were fitted with 1:1 binding model and gave  $K_a = (5.0 \pm 0.3) \times 10^2 \text{ M}^{-1}$ .

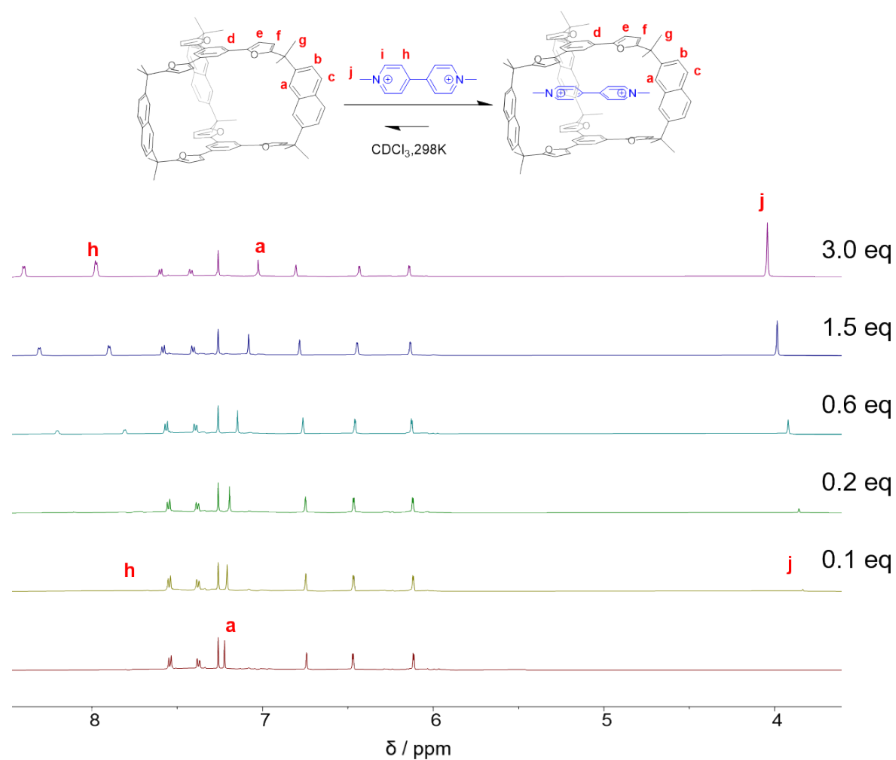

**Figure S22.** Partial  $^1\text{H}$  NMR spectra (600 MHz,  $\text{CDCl}_3/\text{CD}_3\text{CN}=1/1$ , 298 K) of **FPC** recorded after addition of different amount of **G7** from 0 equiv. (bottom) to 3.0 equiv. (top) with a constant concentration of **FPC** ( $[\text{C}] = 2.8 \text{ mM}$ ).

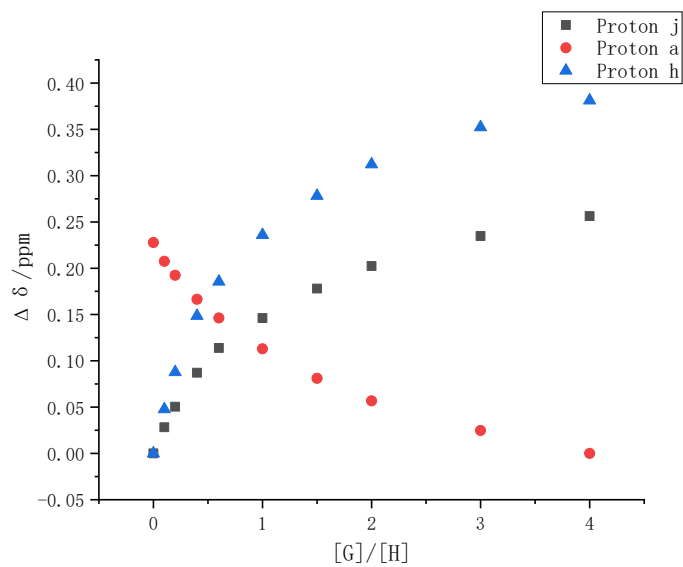

**Figure S23.** Plots of the chemical shift difference ( $\Delta\delta$ ) corresponding to proton j (black), proton a (red) and proton h (blue) versus the guest-to-host ratio. The data were fitted with 1:1 binding model and gave  $K_a = (5.6 \pm 0.8) \times 10^2 \text{ M}^{-1}$ .

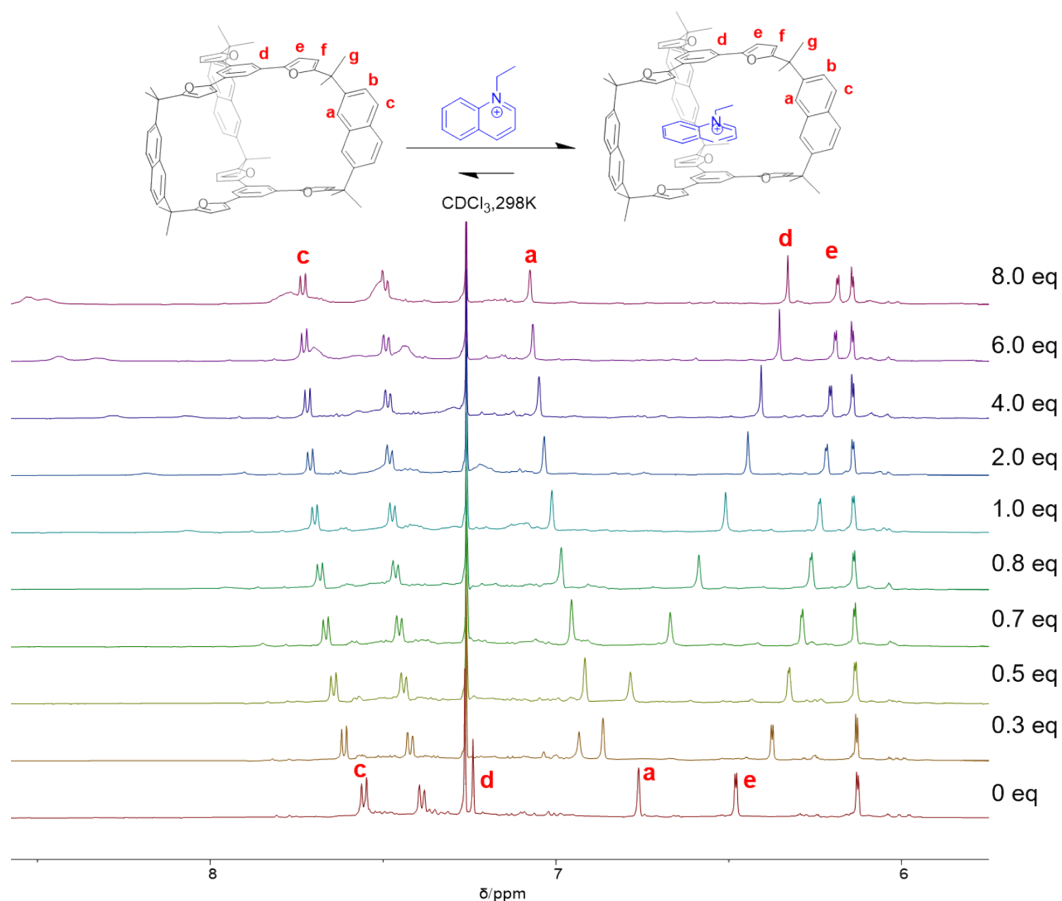

**Figure S24.** Partial  $^1\text{H}$  NMR spectra (600 MHz,  $\text{CDCl}_3$ , 298 K) of FPC) recorded after addition of different amount of G8 from 0 equiv. (bottom) to 8.0 equiv. (top) with a constant concentration of FPC ( $[\text{C}] = 2.8 \text{ mM}$ ).

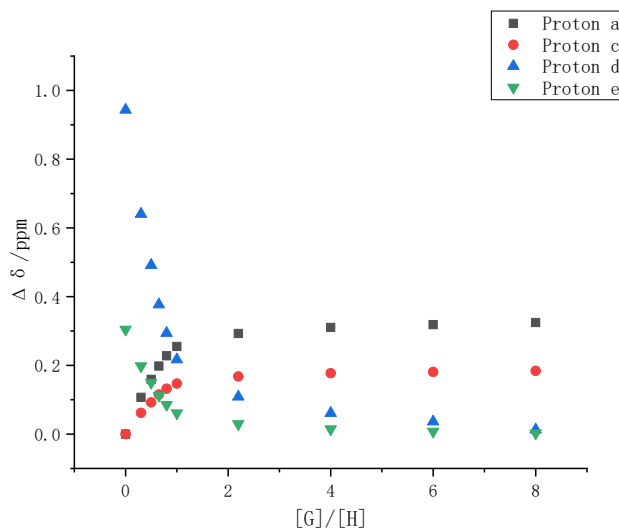

**Figure S25.** Plots of the chemical shift difference ( $\Delta\delta$ ) corresponding to the proton a (black), proton c (red), proton d (blue) and proton e (green) versus the guest-to-host ratio. The data were fitted with 1:1 binding model and gave  $K_a = (1.0 \pm 0.2) \times 10^4 \text{ M}^{-1}$ .

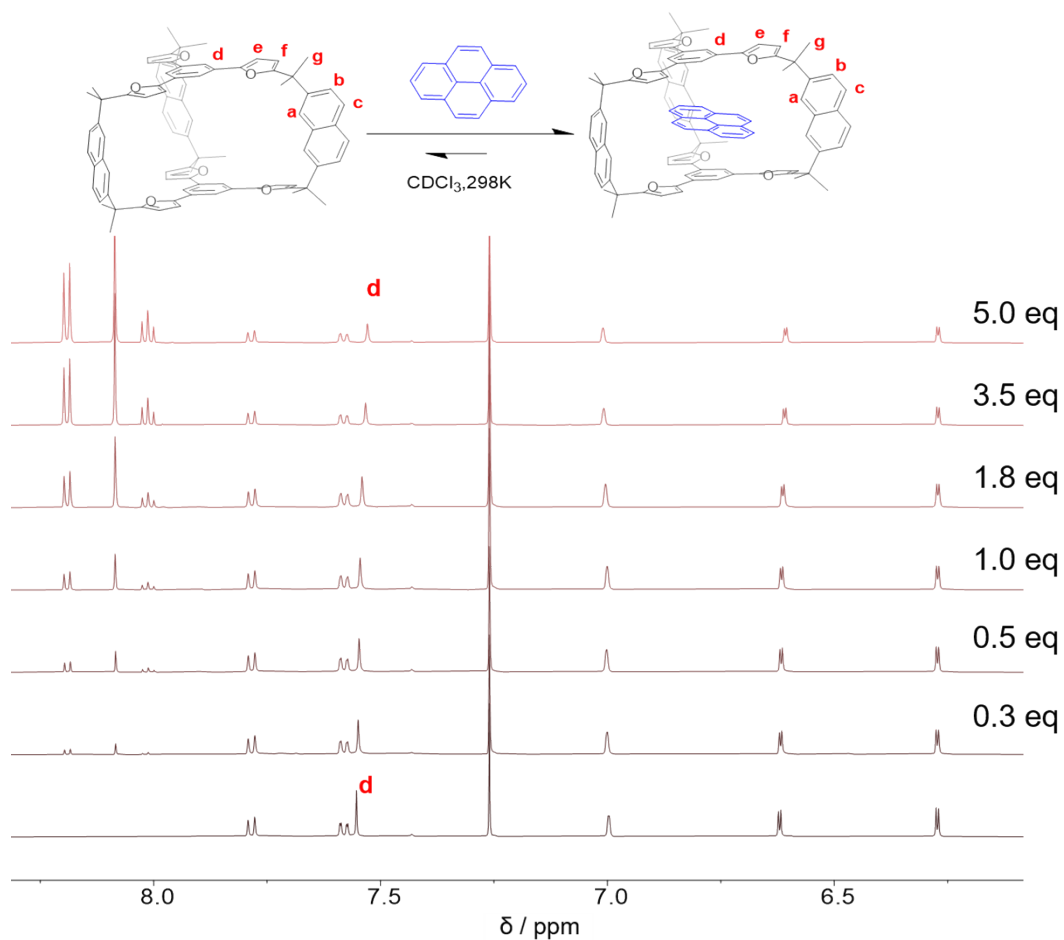

**Figure S26.** Partial  $^1\text{H}$  NMR spectra (600 MHz,  $\text{CDCl}_3$ , 298 K) of **FPC** recorded after addition of different amount of **G9** from 0 equiv. (bottom) to 5.0 equiv. (top) with a constant concentration of **FPC** ( $[\text{C}] = 2.8 \text{ mM}$ ).

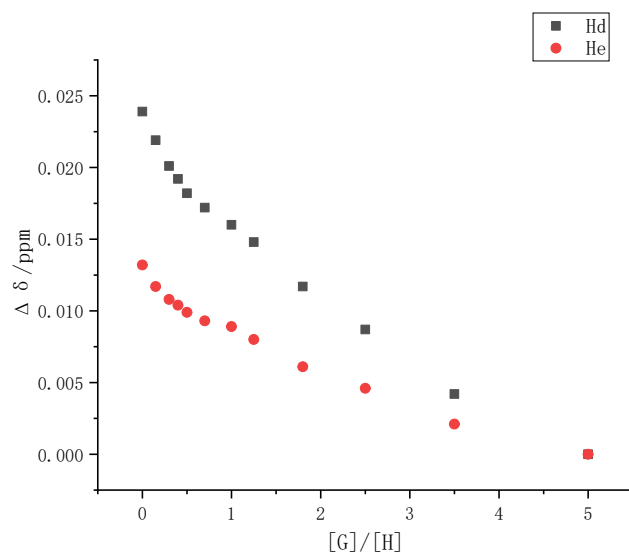

**Figure S27.** Plots of the chemical shift difference ( $\Delta\delta$ ) corresponding to the proton e (red) and proton d (black) versus the guest-to-host ratio. The data fitted with 1:1 binding model and gave  $K_a = (1.0 \pm 0.0) \times 10^2 \text{ M}^{-1}$ .

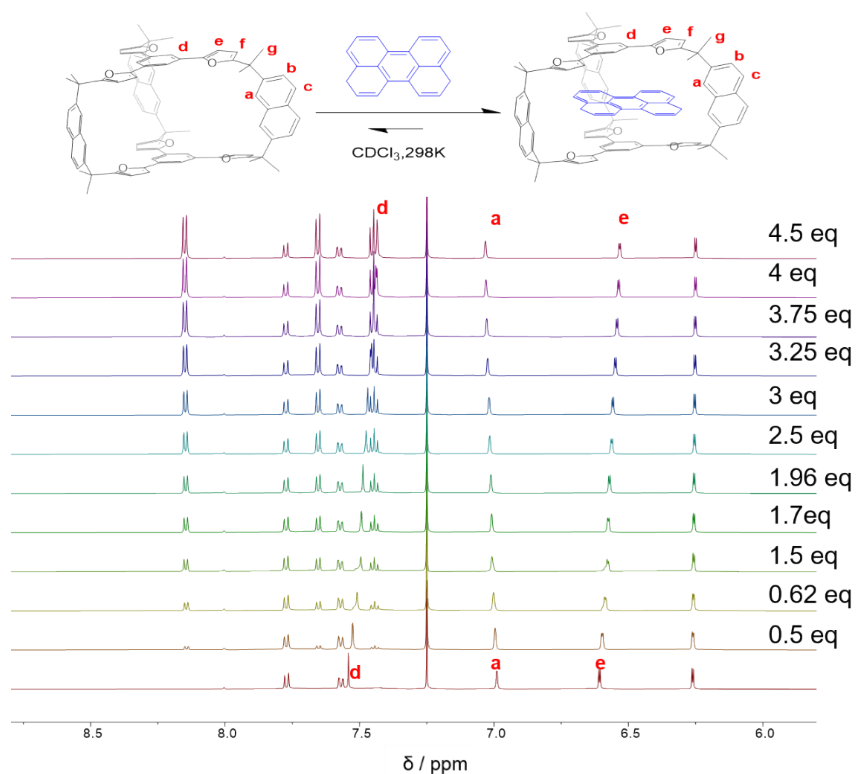

**Figure S28.** Partial  $^1\text{H}$  NMR spectra (600 MHz,  $\text{CDCl}_3$ , 298 K) of **FPC** recorded after addition of different amount of **G10** from 0 equiv. (bottom) to 4.5 equiv. (top) with a constant concentration of **FPC** ( $[\text{C}] = 2.8 \text{ mM}$ ).

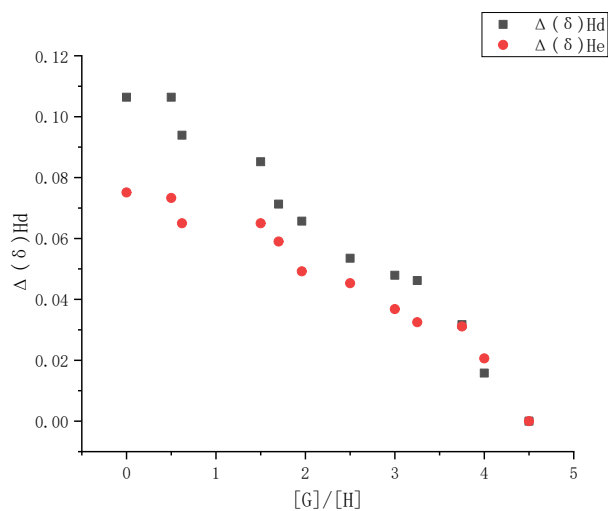

**Figure S29.** Plots of the chemical shift difference ( $\Delta\delta$ ) corresponding to the proton e (red) and proton d (black) versus the guest-to-host ratio. The data were fitted with 1:1 binding model and gave  $K_a = (3.7 \pm 0.1) \times 10^2 \text{ M}^{-1}$ .

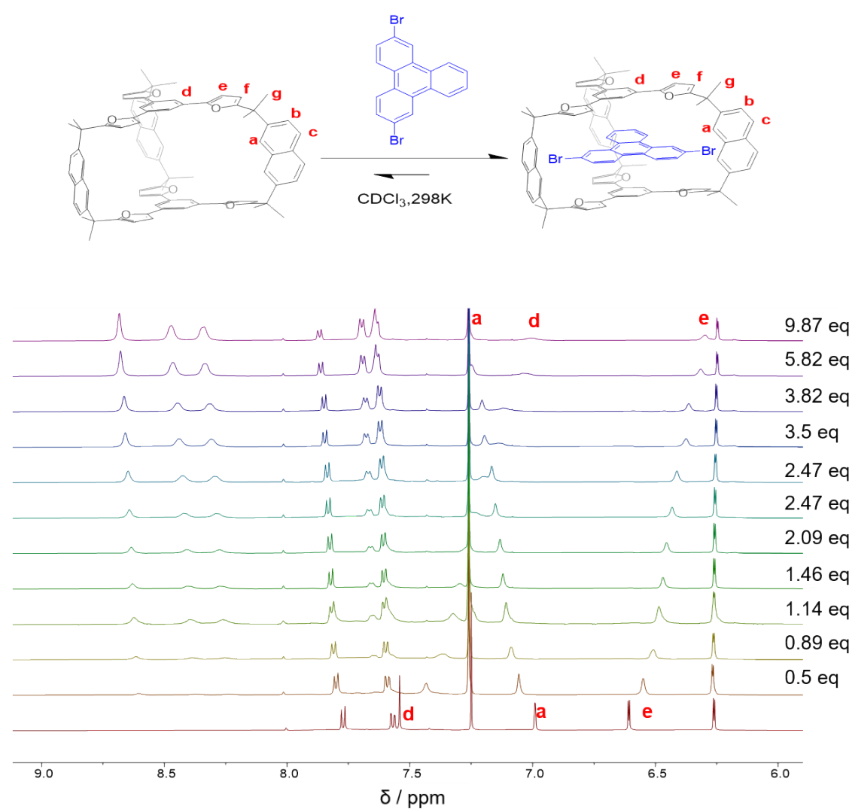

**Figure S30.** Partial  $^1\text{H}$  NMR spectra (600 MHz,  $\text{CDCl}_3$ , 298 K) of **FPC** recorded after addition of different amount of **G11** from 0 equiv. (bottom) to 4.5 equiv. (top) with a constant concentration of **FPC** ( $[\text{C}] = 2.8 \text{ mM}$ ).

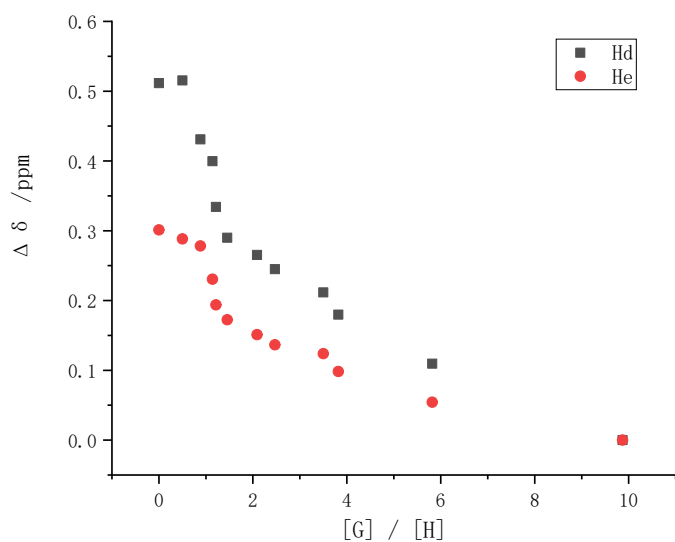

**Figure S31.** Plots of the chemical shift difference ( $\Delta\delta$ ) corresponding to the proton e (red) and proton d (black) versus the amount of the guest-to-host ratio. The data were fitted with 1:1 binding model and gave  $K_a = (2.3 \pm 0.1) \times 10^3 \text{ M}^{-1}$ .

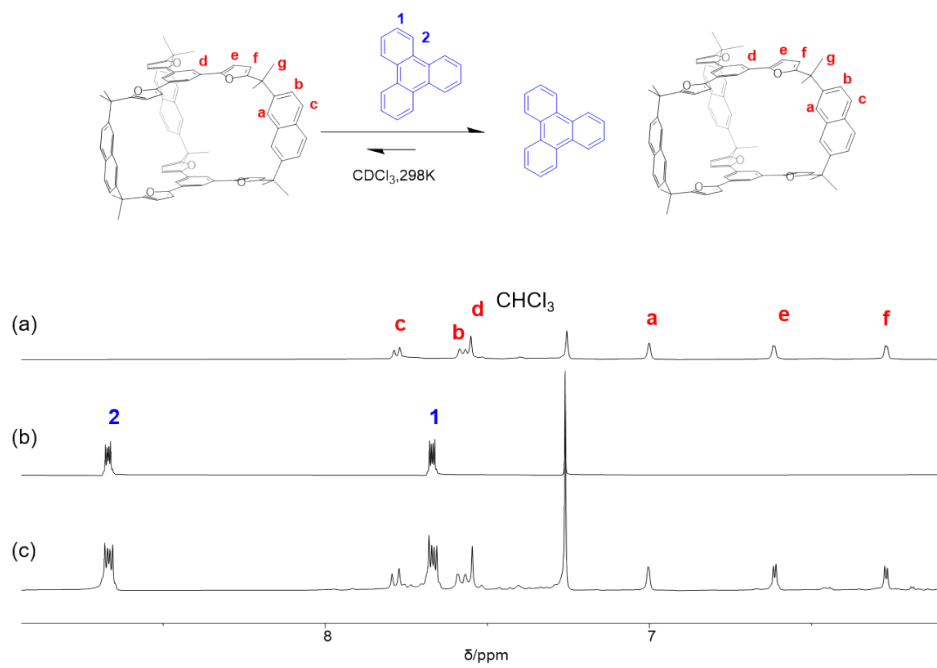

**Figure S32.** Partial  $^1\text{H}$  NMR spectra (600 MHz,  $\text{CDCl}_3$ , 298 K) of (a) FPC. (b) Triphenylene. (c) FPC + Triphenylene (6 equiv.).

## 4. Photophysical Properties of the Charge Transfer Systems.

(a)

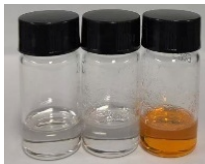

(b)

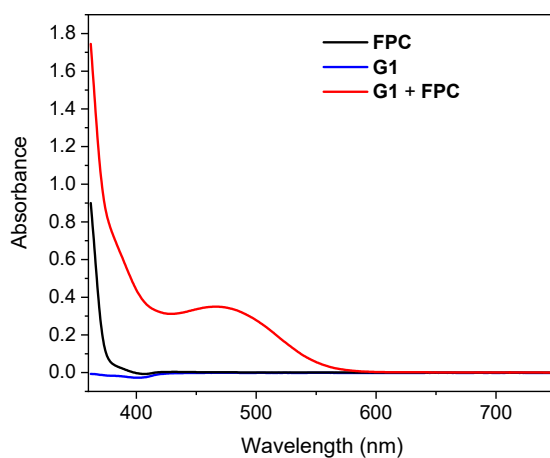

**Figure S33.** (a) The optical images show the solution color changes, from left to right: **FPC** ( $\text{CHCl}_3$ , 7.0mM), **G1** ( $\text{CHCl}_3$ , 7.0mM) and the mixture of **G1** and **FPC** under the same conditions. (b) UV-vis absorption spectrum of **G1** (black), **FPC** (red) and **G1**+**FPC** (blue) in  $\text{CHCl}_3$  ( $2.5 \times 10^{-5}\text{M}$ , 298K).

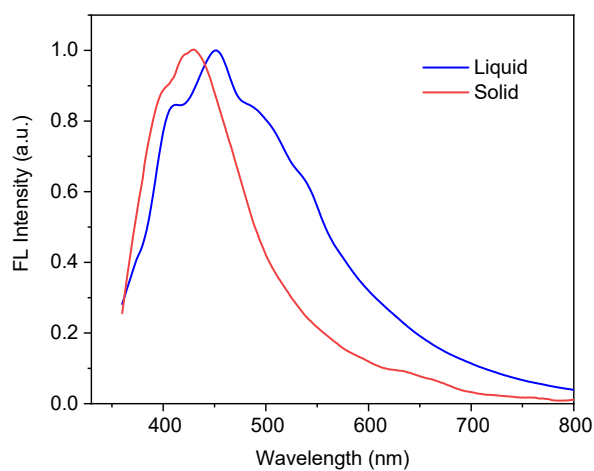

**Figure S34.** Normalized fluorescence emission spectra of **FPC** ( $\lambda_{\text{ex}} = 350 \text{ nm}$ ). Red line corresponding to the of the solid sample. Blue line corresponding to the solution sample in  $\text{CHCl}_3$ .

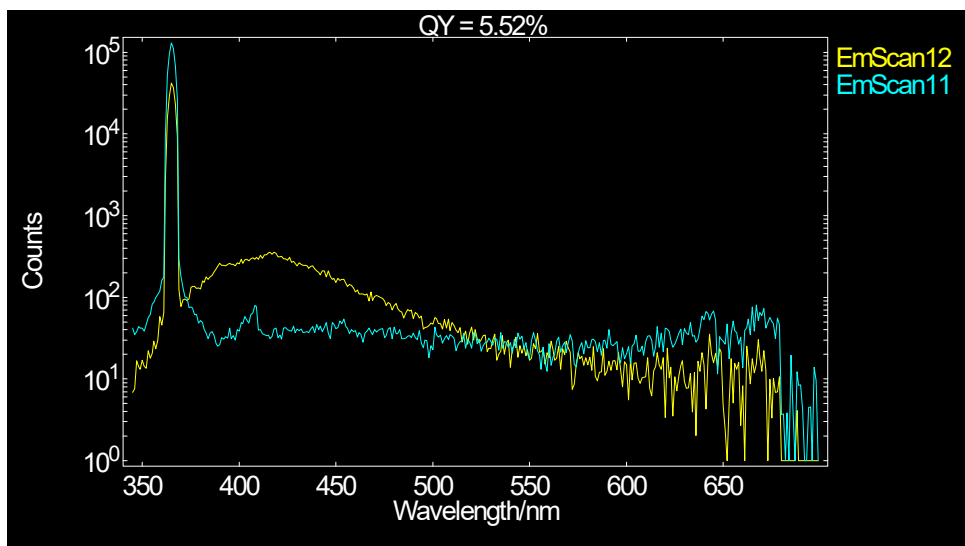

**Figure S35.** Fluorescence quantum efficiency of FPC.

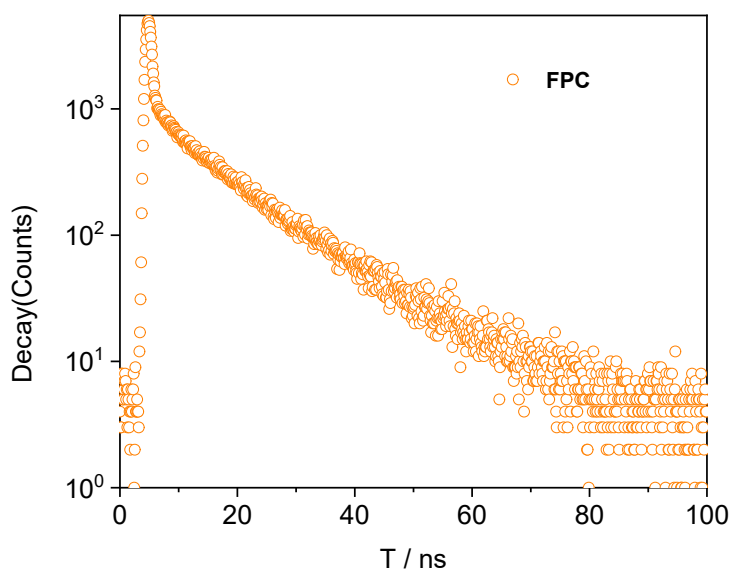

**Figure S36.** Fluorescence emission lifetime of FPC in the solid state ( $\lambda_{\text{ex}} = 360$  nm,  $\tau = 19.9$  ns).

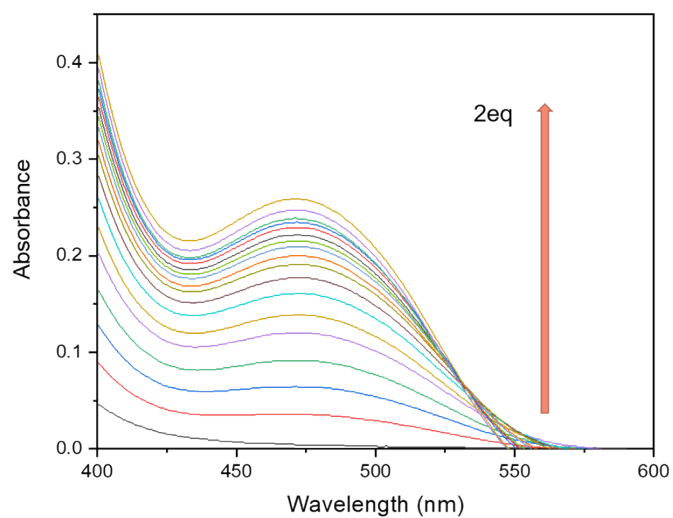

**Figure S37.** The alternation of UV-vis absorption in a chloroform solution (2.0 mM) after addition of different amount of **G1** in the **FPC** solution, from 0 (bottom) to 2 equiv. (top).

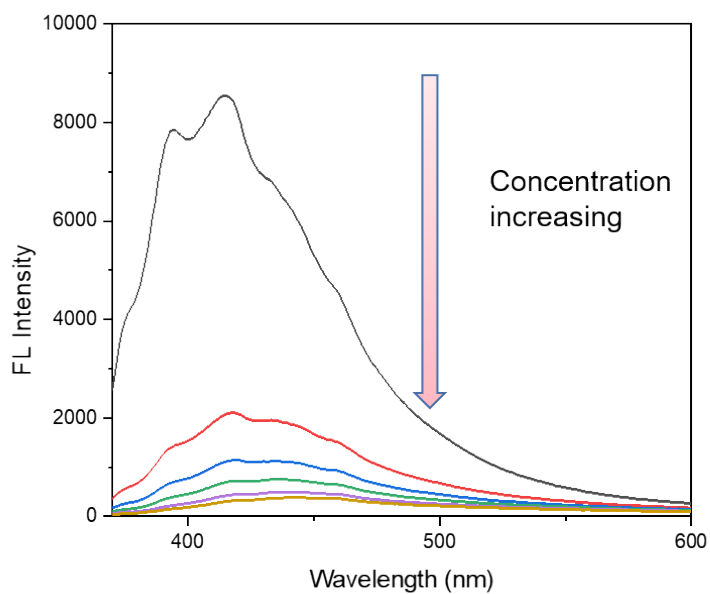

**Figure S38.** Fluorescence titration ( $\lambda_{\text{ex}} = 350 \text{ nm}$ ) of **FPC** (0.70 mM) in  $\text{CHCl}_3$  at room temperature upon a gradual increase in the concentration of **G1** (from 0 to 0.35 mM).

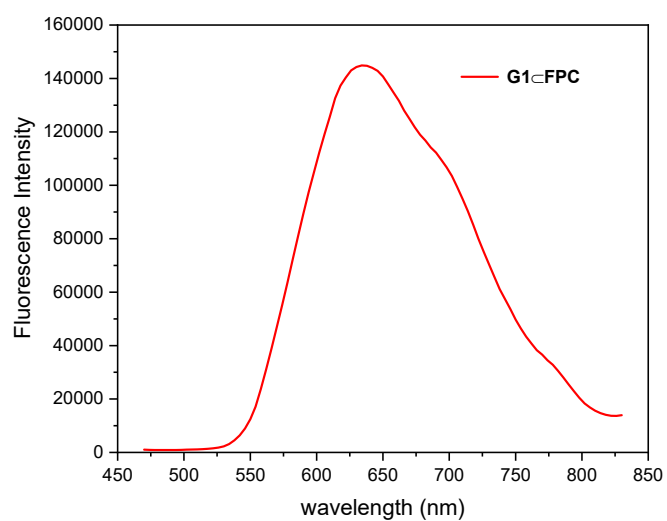

**Figure S39.** Normalized fluorescence emission spectra of cocystal **G1cFPC** in the solid state ( $\lambda_{\text{ex}} = 460$  nm).

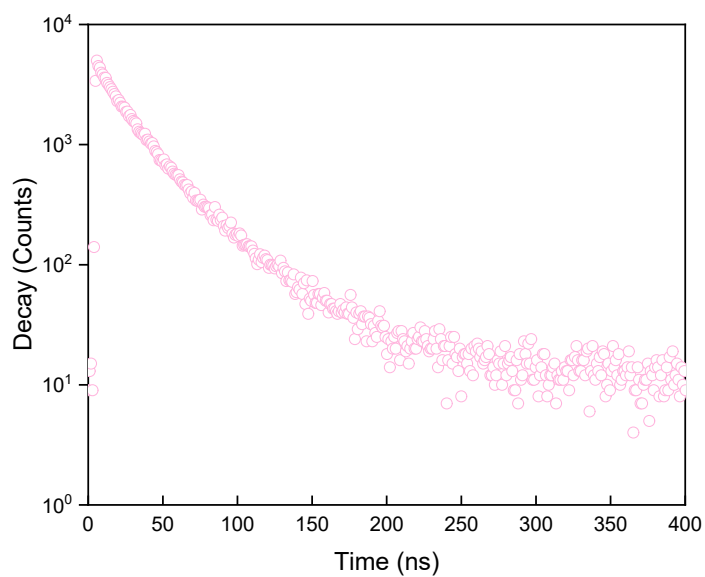

**Figure S40.** Fluorescence emission lifetime of **G1cFPC** in the solid state ( $\lambda_{\text{ex}} = 450$  nm,  $\tau = 33.5$  ns).

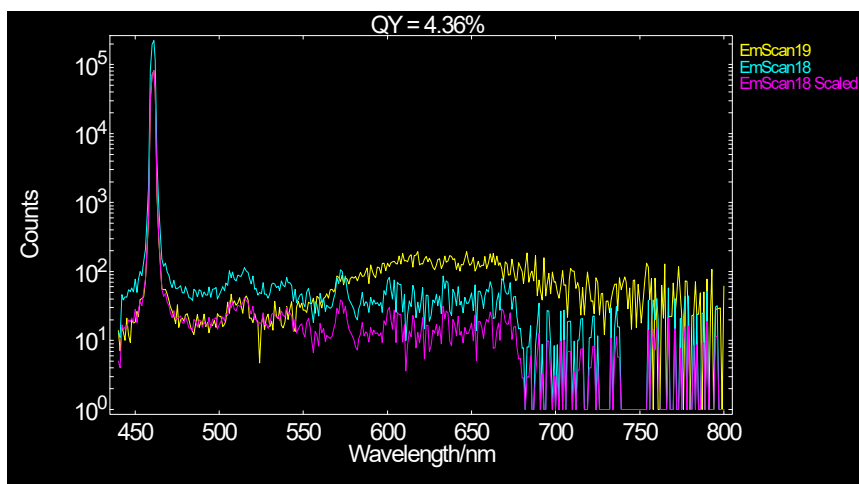

Figure S41. Fluorescence quantum efficiency of G1cFPC.

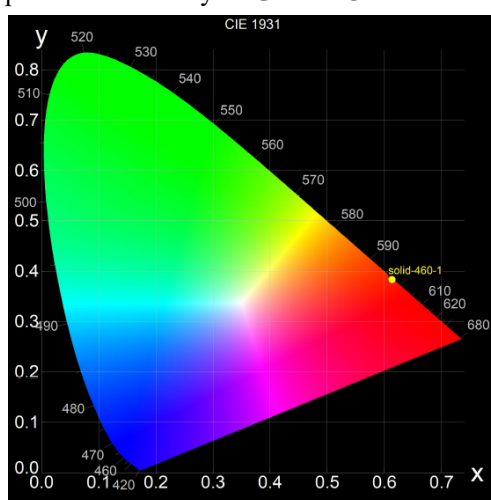

Figure S42. The CIE coordinate of G1cFPC.

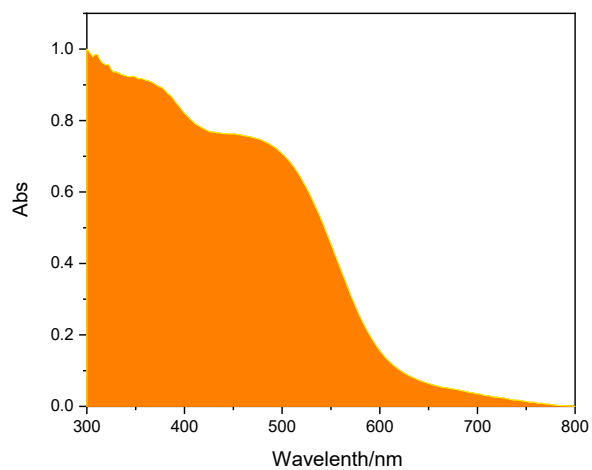

Figure S43. Normalized solid-state UV-vis absorption spectra of crystalline G1cFPC.

(a)

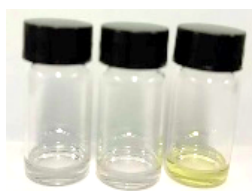

(b)

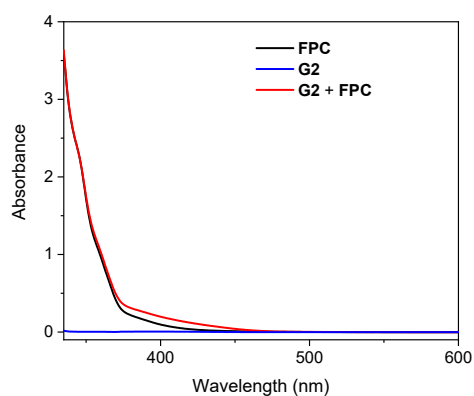

**Figure S44.** (a) The optical images show the solution color changes, from left to right: **FPC** ( $\text{CHCl}_3$ , 7.0 mM), **G2** ( $\text{CHCl}_3$ , 7.0 mM) and the mixture of **G2** and **FPC** under the same conditions. (b) UV-vis absorption spectrum of **FPC** (blue), **G2** (black) and **G2**+**FPC** (red) in  $\text{CHCl}_3$  (7.0 mM, 298 K).

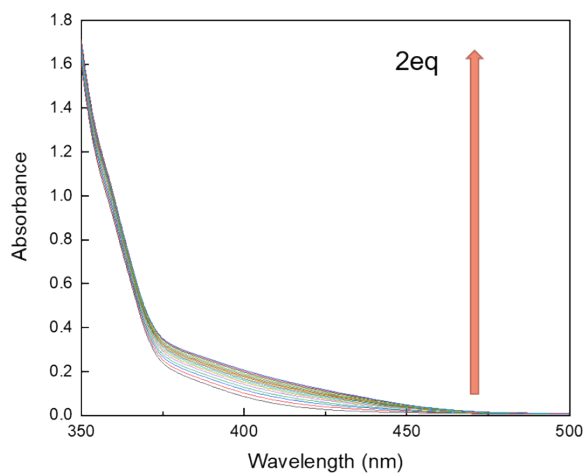

**Figure S45.** The alternation of UV-vis absorption in a chloroform solution (2.0 mM) after addition of different amount of **G2** in the **FPC** solution, from 0 (bottom) to 1.6 equiv. (top).

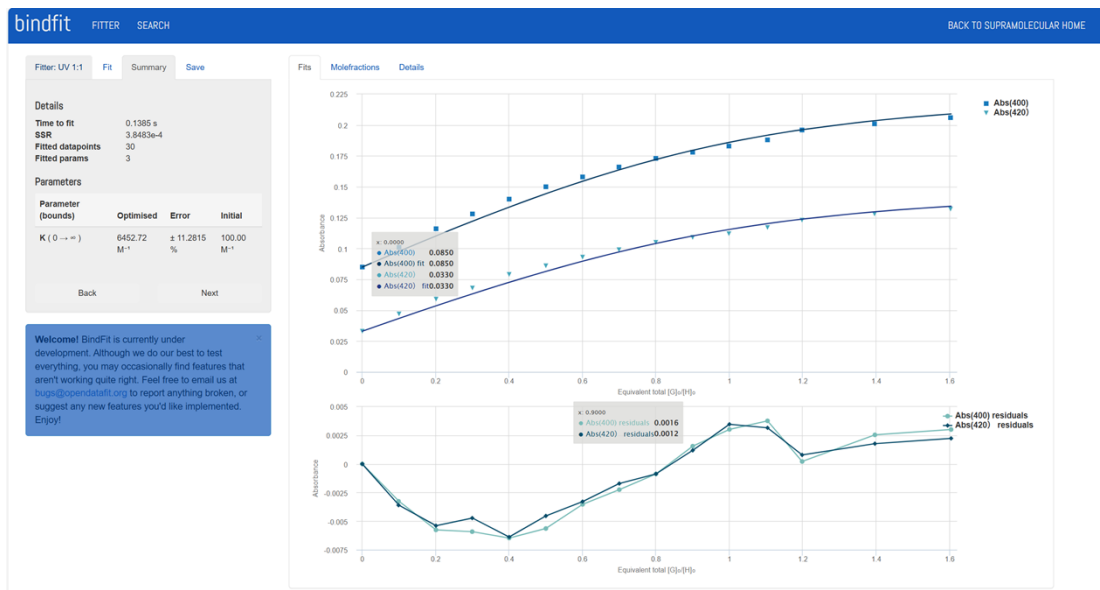

**Figure S46.** Plots of absorbance at 400 nm and 420 nm versus  $[G2]/[FPC]$ . The data were fitted to a 1:1 binding model, giving  $K_a = (6.4 \pm 0.6) \times 10^3 \text{ M}^{-1}$ . All plots were obtained from non-linear curve-fitting to a 1:1 binding model using the [www.supramolecular.org](http://www.supramolecular.org) web applet.

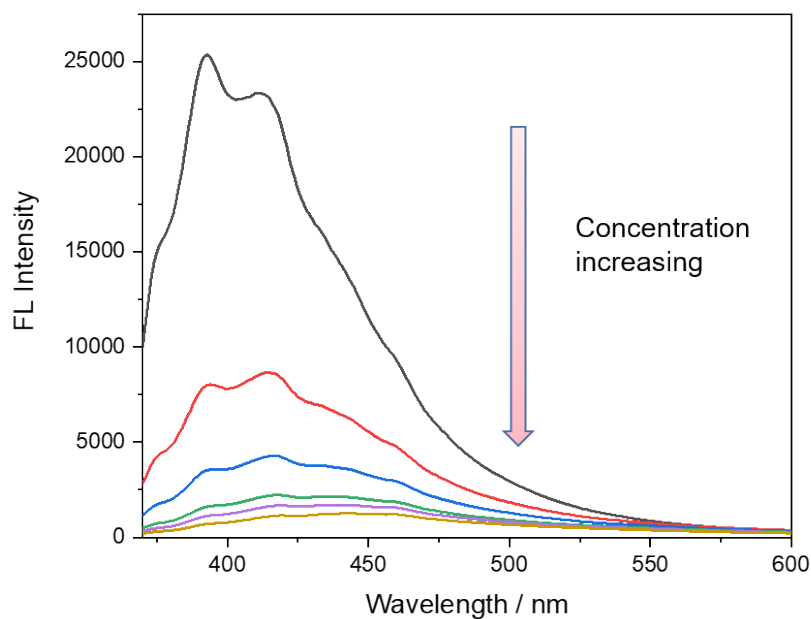

**Figure S47.** Fluorescence titration ( $\lambda_{\text{ex}} = 350 \text{ nm}$ ) of FPC (0.75 mM) in  $\text{CHCl}_3$  at room temperature upon a gradual increase in the concentration of G2 (from 0 to 0.38 mM).

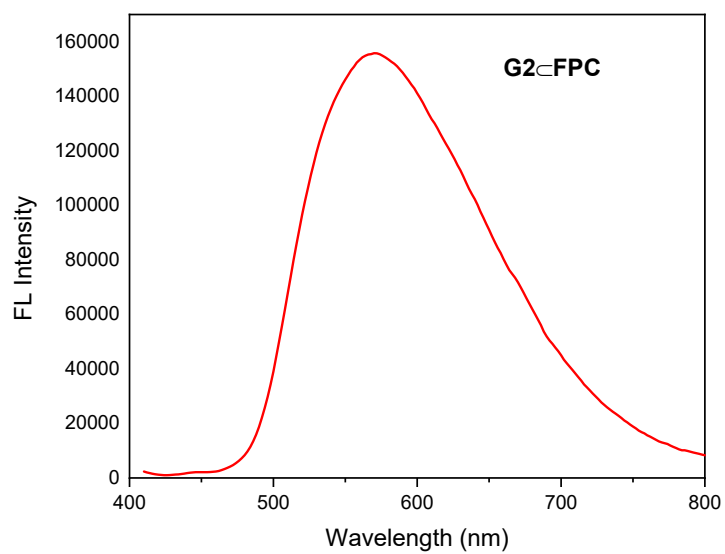

**Figure S48.** Normalized fluorescence emission spectra of cocystal **G2-FPC** in the solid state ( $\lambda_{\text{ex}} = 400$  nm).

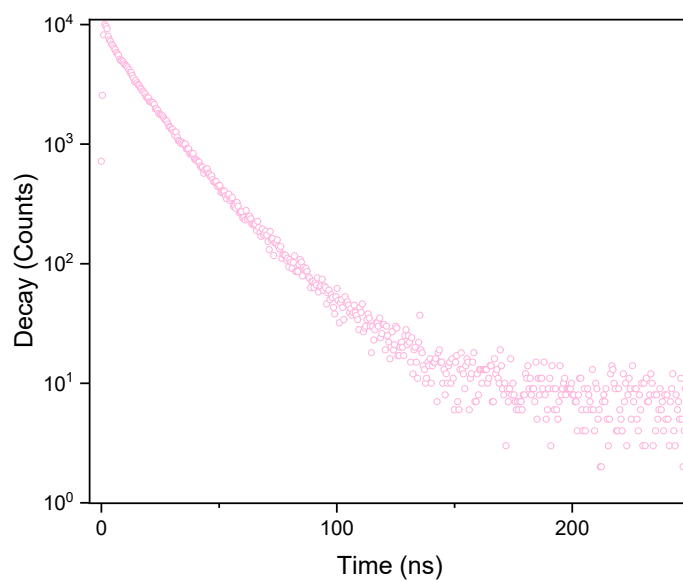

**Figure S49.** Fluorescence emission lifetime of **G2-FPC** in the solid state. ( $\lambda_{\text{ex}} = 360$  nm,  $\tau = 15.5$  ns).

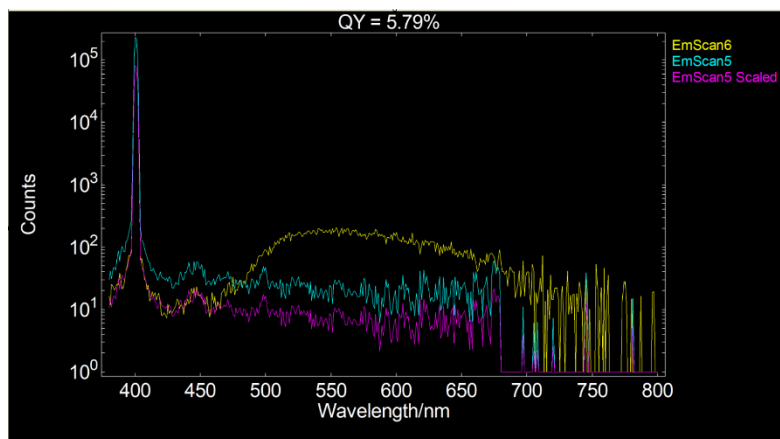

**Figure S50.** Fluorescence quantum efficiency of **G2cFPC**.

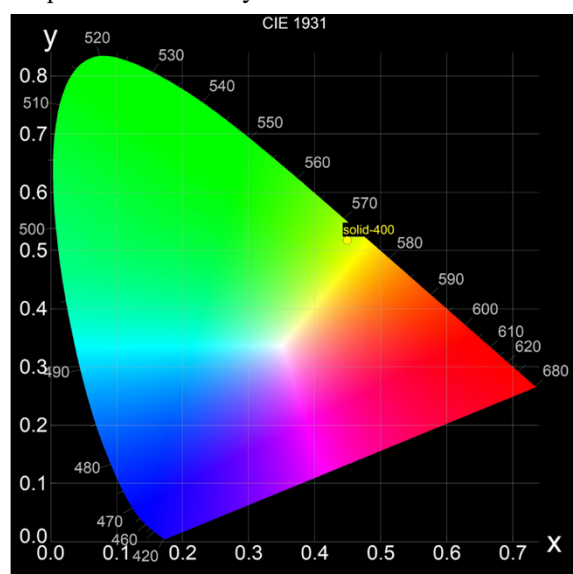

**Figure S51.** The CIE coordinates of **G2cFPC**.

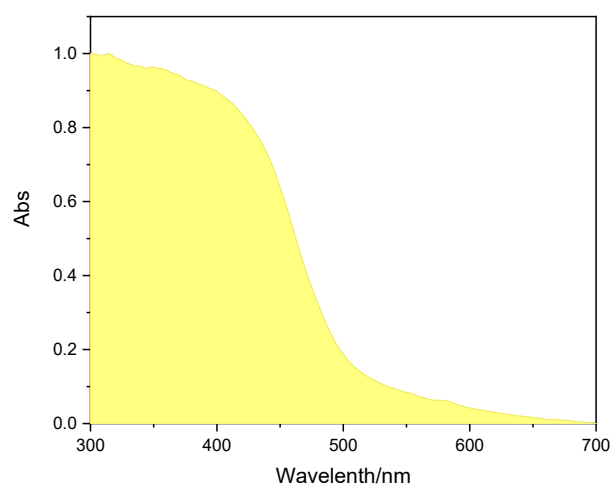

**Figure S52.** Normalized solid-state UV-vis absorption spectra of crystalline **G2cFPC**.

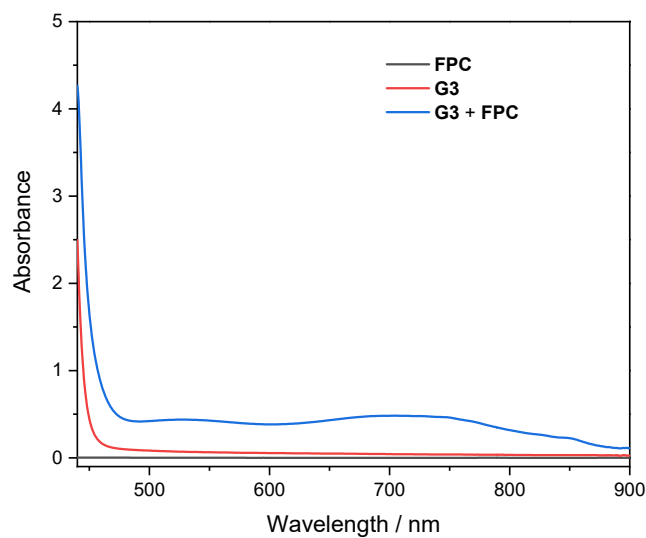

**Figure S53.** UV-vis absorption spectrum of **FPC** (black), **G3** (red) and **G3@FPC** (blue) in  $\text{CHCl}_3$  (7.0 Mm, 298 K).

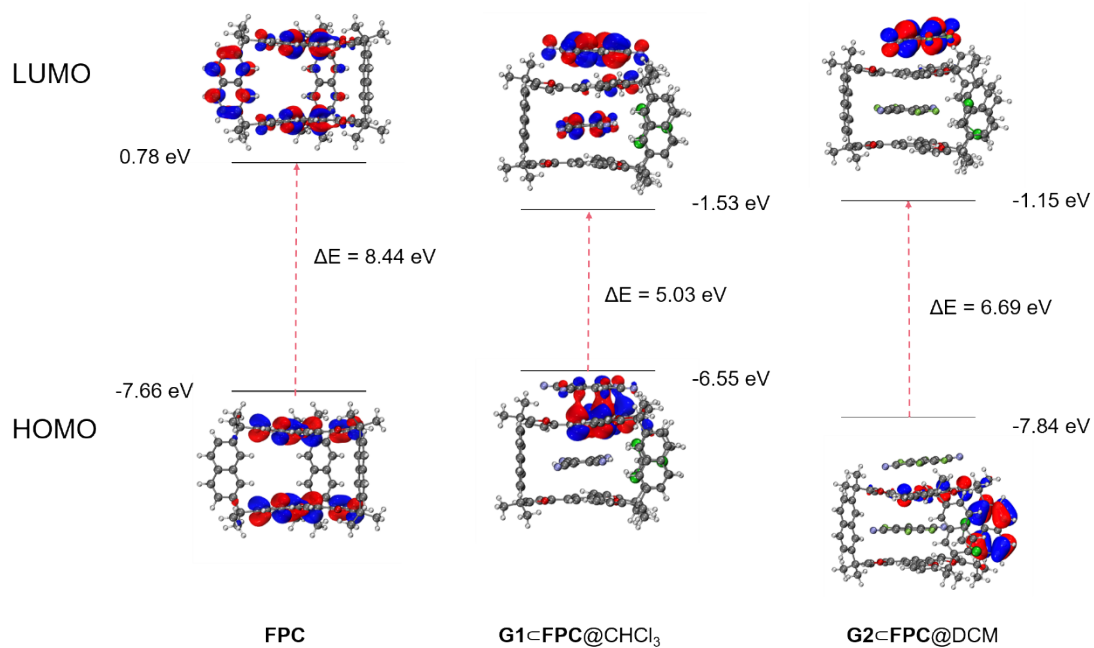

**Figure S54.** HOMO and LUMO distribution and frontier orbital energy levels calculation results of **FPC**, **G1@FPC@CHCl<sub>3</sub>** and **G2@FPC@DCM**.

(a)

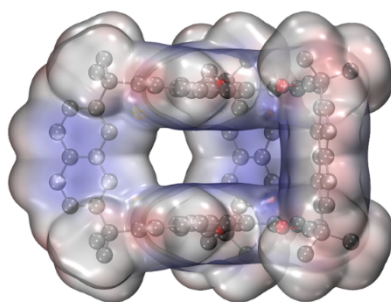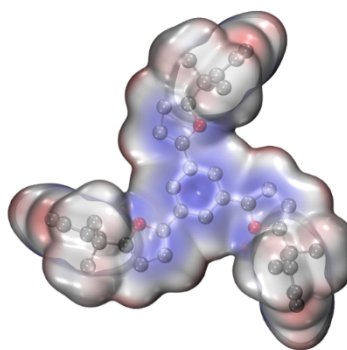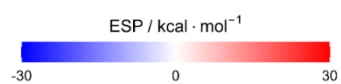

(b)

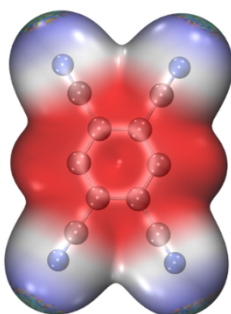

(c)

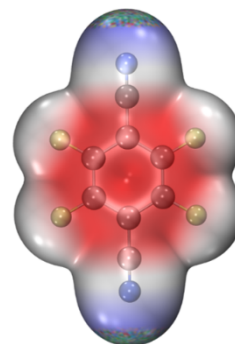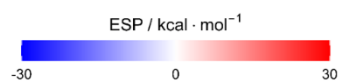

**Figure S55.** ESP maps of (a) FPC (top and side views). (b) G1. (c) G2.

## 5. Single crystal information.

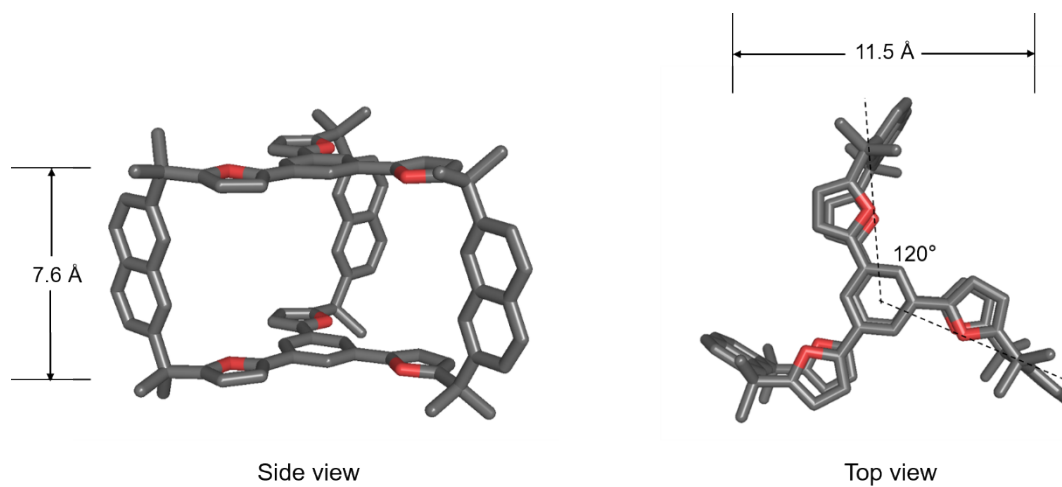

**Figure S56.** The single crystal structure of FPC showing a  $C_{3h}$  axis of symmetry. Left: the side view of the framework and right: the top view of the framework.

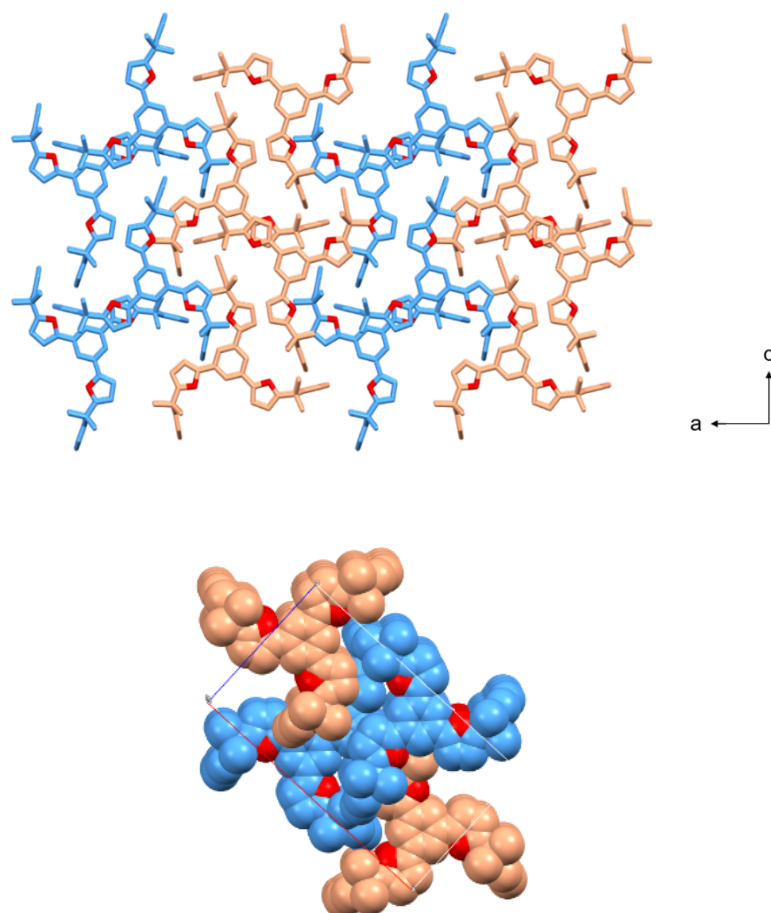

**Figure S57.** Layer-like packing structure formed by adjacent molecules in the  $ac$  plane. TOP: capped stick image. Bottom: spacefill image.

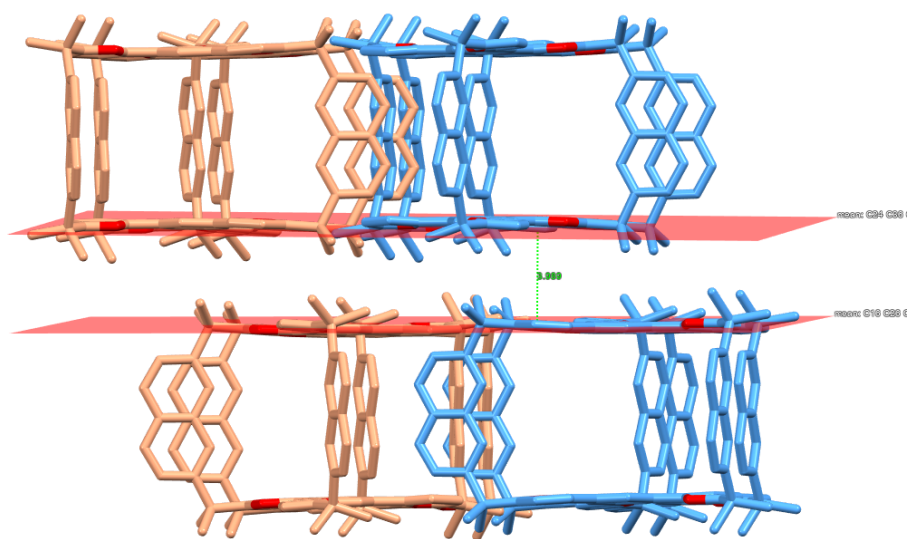

**Figure S58.** Side view of layer-like superstructure networks formed by FPC,  $\pi \dots \pi$  interactions between the adjacent TPB planes are labelled.

**Table 1 Crystal data and structure refinement for Single-Crystal FPC**

---

|                                             |                                                               |
|---------------------------------------------|---------------------------------------------------------------|
| Empirical formula                           | C <sub>168</sub> H <sub>144</sub> O <sub>12</sub>             |
| Formula weight                              | 2354.82                                                       |
| Temperature/K                               | 223.00                                                        |
| Crystal system                              | orthorhombic                                                  |
| Space group                                 | Pnma                                                          |
| a/Å                                         | 23.9792(9)                                                    |
| b/Å                                         | 23.1831(7)                                                    |
| c/Å                                         | 13.8712(5)                                                    |
| $\alpha$ /°                                 | 90                                                            |
| $\beta$ /°                                  | 90                                                            |
| $\gamma$ /°                                 | 90                                                            |
| Volume/Å <sup>3</sup>                       | 7711.2(5)                                                     |
| Z                                           | 2                                                             |
| $\rho$ <sub>calc</sub> /cm <sup>3</sup>     | 1.014                                                         |
| $\mu$ /mm <sup>-1</sup>                     | 0.063                                                         |
| F(000)                                      | 2496.0                                                        |
| Crystal size/mm <sup>3</sup>                | 0.23 × 0.1 × 0.07                                             |
| Radiation                                   | MoK $\alpha$ ( $\lambda$ = 0.71073)                           |
| 2 $\theta$ range for data collection/°      | 3.82 to 50.076                                                |
| Index ranges                                | -28 ≤ h ≤ 28, -27 ≤ k ≤ 27, -16 ≤ l ≤ 16                      |
| Reflections collected                       | 122007                                                        |
| Independent reflections                     | 7005 [R <sub>int</sub> = 0.0954, R <sub>sigma</sub> = 0.0284] |
| Data/restraints/parameters                  | 7005/0/421                                                    |
| Goodness-of-fit on F <sup>2</sup>           | 1.051                                                         |
| Final R indexes [I ≥ 2 $\sigma$ (I)]        | R <sub>1</sub> = 0.0482, wR <sub>2</sub> = 0.1352             |
| Final R indexes [all data]                  | R <sub>1</sub> = 0.0676, wR <sub>2</sub> = 0.1495             |
| Largest diff. peak/hole / e Å <sup>-3</sup> | 0.40/-0.26                                                    |
| CCDC number                                 | 2422476                                                       |

---

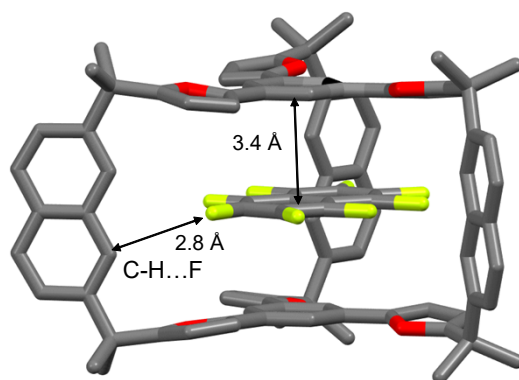

**Figure S59.** The single crystal structure of the complex **G4CFPC**. The existence of  $\pi \dots \pi$  interactions between guests and TPB planes and C-H...F hydrogen bonds are labelled.

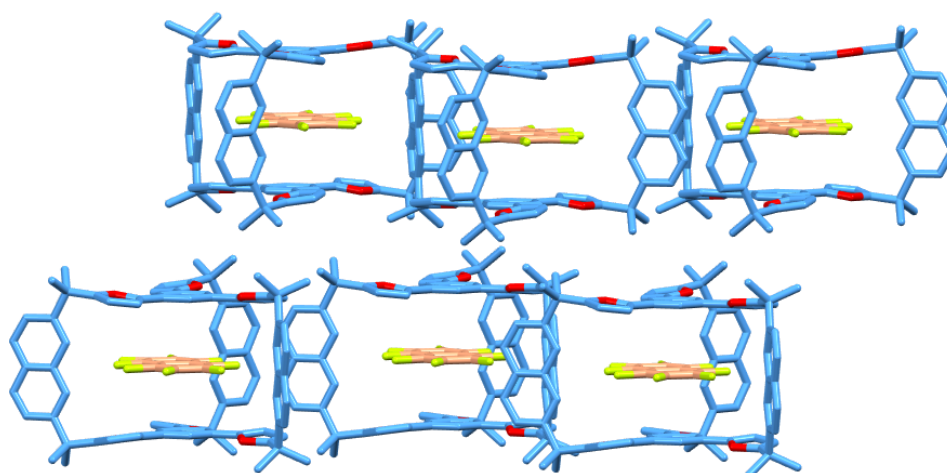

**Figure S60.** Illustration of layer-like superstructure formed by **G4CFPC**.

**Table 2. Crystal data and structure refinement for Single-Crystal (G4cFPC)**

---

|                                             |                                                               |
|---------------------------------------------|---------------------------------------------------------------|
| Empirical formula                           | C <sub>94</sub> H <sub>72</sub> F <sub>8</sub> O <sub>6</sub> |
| Formula weight                              | 1449.51                                                       |
| Temperature/K                               | 170.00                                                        |
| Crystal system                              | hexagonal                                                     |
| Space group                                 | P6 <sub>3</sub> /m                                            |
| a/Å                                         | 14.1009(3)                                                    |
| b/Å                                         | 14.1009(3)                                                    |
| c/Å                                         | 22.9661(10)                                                   |
| $\alpha$ /°                                 | 90                                                            |
| $\beta$ /°                                  | 90                                                            |
| $\gamma$ /°                                 | 120                                                           |
| Volume/Å <sup>3</sup>                       | 3954.7(2)                                                     |
| Z                                           | 2                                                             |
| $\rho_{\text{calc}}/\text{cm}^3$            | 1.217                                                         |
| $\mu/\text{mm}^{-1}$                        | 0.461                                                         |
| F(000)                                      | 1512.0                                                        |
| Crystal size/mm <sup>3</sup>                | 0.23 × 0.1 × 0.07                                             |
| Radiation                                   | GaK $\alpha$ ( $\lambda = 1.34139$ )                          |
| 2 $\theta$ range for data collection/°      | 6.296 to 121.234                                              |
| Index ranges                                | -17 ≤ h ≤ 17, -18 ≤ k ≤ 18, -29 ≤ l ≤ 29                      |
| Reflections collected                       | 21014                                                         |
| Independent reflections                     | 3100 [R <sub>int</sub> = 0.0621, R <sub>sigma</sub> = 0.0822] |
| Data/restraints/parameters                  | 3100/241/261                                                  |
| Goodness-of-fit on F <sup>2</sup>           | 1.049                                                         |
| Final R indexes [I ≥ 2 $\sigma$ (I)]        | R <sub>1</sub> = 0.0651, wR <sub>2</sub> = 0.1816             |
| Final R indexes [all data]                  | R <sub>1</sub> = 0.0770, wR <sub>2</sub> = 0.1917             |
| Largest diff. peak/hole / e Å <sup>-3</sup> | 0.40/-0.38                                                    |
| CCDC number                                 | 2430685                                                       |

---

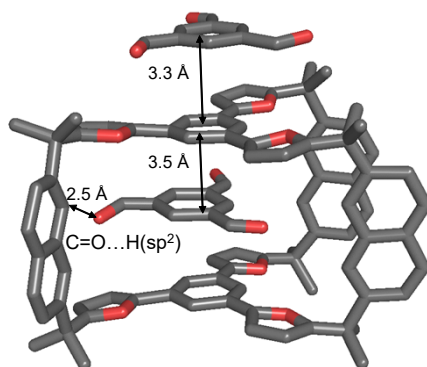

**Figure S61.** The single crystal structure of the complex **G5cFPC**. The existence of  $\pi\cdots\pi$  interactions between guests and TPB planes and hydrogen bonds between guests and aromatic hydrogens are labelled. The framework exhibits a little distortion compared to compound **FPC** due to the presence of the hydrogen bonds.

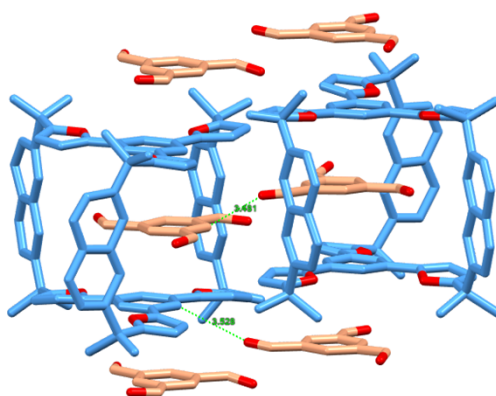

**Figure S62.** Illustration of various C-H...O hydrogen bonds between adjacent units in the crystal structure of the complex **G5cFPC**.

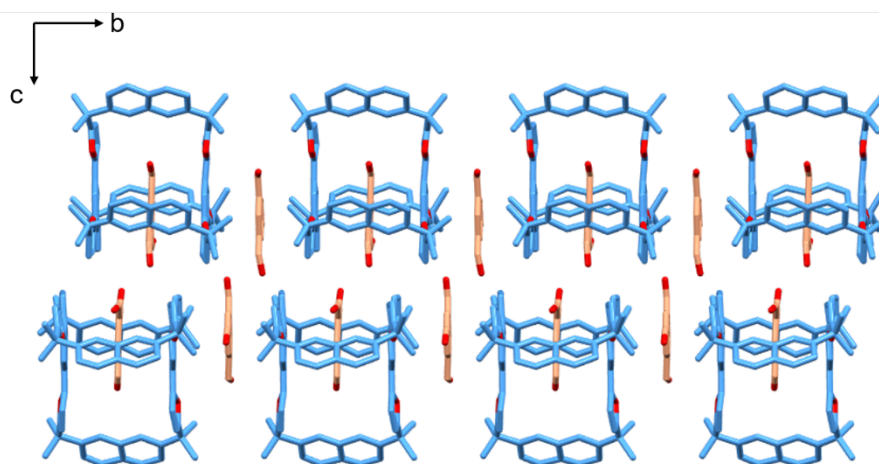

**Figure S63.** Illustration of the “sandwich”-like superstructure in the *bc* plane, revealing an array arrangement based on  $\pi\cdots\pi$  interactions with a 1:2 host-guest ratio in the crystal structure of the complex **G5cFPC**.

**Table 3. Crystal data and structure refinement for Single-Crystal (G5cFPC)**

---

|                                             |                                                                  |
|---------------------------------------------|------------------------------------------------------------------|
| Empirical formula                           | C <sub>104</sub> H <sub>86</sub> Cl <sub>6</sub> O <sub>12</sub> |
| Formula weight                              | 1740.42                                                          |
| Temperature/K                               | 170.00                                                           |
| Crystal system                              | monoclinic                                                       |
| Space group                                 | Cc                                                               |
| a/Å                                         | 36.710(2)                                                        |
| b/Å                                         | 13.5712(9)                                                       |
| c/Å                                         | 42.156(3)                                                        |
| $\alpha$ /°                                 | 90                                                               |
| $\beta$ /°                                  | 113.644(3)                                                       |
| $\gamma$ /°                                 | 90                                                               |
| Volume/Å <sup>3</sup>                       | 19239(2)                                                         |
| Z                                           | 8                                                                |
| $\rho_{\text{calc}}/\text{cm}^3$            | 1.202                                                            |
| $\mu/\text{mm}^{-1}$                        | 1.384                                                            |
| F(000)                                      | 7264.0                                                           |
| Crystal size/mm <sup>3</sup>                | 0.17 × 0.17 × 0.05                                               |
| Radiation                                   | GaK $\alpha$ ( $\lambda$ = 1.34139)                              |
| 2 $\theta$ range for data collection/°      | 6.11 to 110.358                                                  |
| Index ranges                                | -44 ≤ h ≤ 42, -15 ≤ k ≤ 16, -51 ≤ l ≤ 51                         |
| Reflections collected                       | 108224                                                           |
| Independent reflections                     | 34483 [R <sub>int</sub> = 0.0654, R <sub>sigma</sub> = 0.0671]   |
| Data/restraints/parameters                  | 34483/244/2199                                                   |
| Goodness-of-fit on F <sup>2</sup>           | 1.274                                                            |
| Final R indexes [I ≥ 2 $\sigma$ (I)]        | R <sub>1</sub> = 0.1282, wR <sub>2</sub> = 0.2948                |
| Final R indexes [all data]                  | R <sub>1</sub> = 0.1455, wR <sub>2</sub> = 0.3041                |
| Largest diff. peak/hole / e Å <sup>-3</sup> | 0.66/-0.70                                                       |
| Flack parameter                             | 0.52(5)                                                          |
| CCDC number                                 | 2422477                                                          |

---

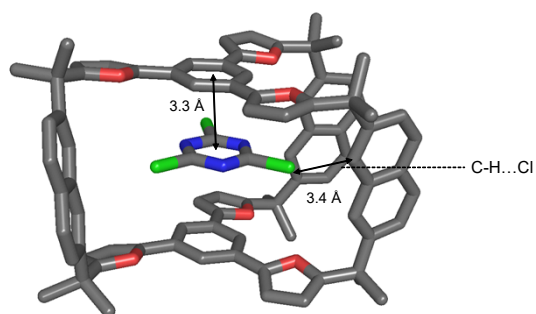

**Figure S64.** The single crystal structure of the complex **G6c-FPC**. The existence of  $\pi \dots \pi$  interactions between guests and TPB planes and hydrogen bonds between guests and aromatic hydrogens are labelled. The framework exhibits a little distortion compared to compound **FPC** due to the presence of the hydrogen bonds.

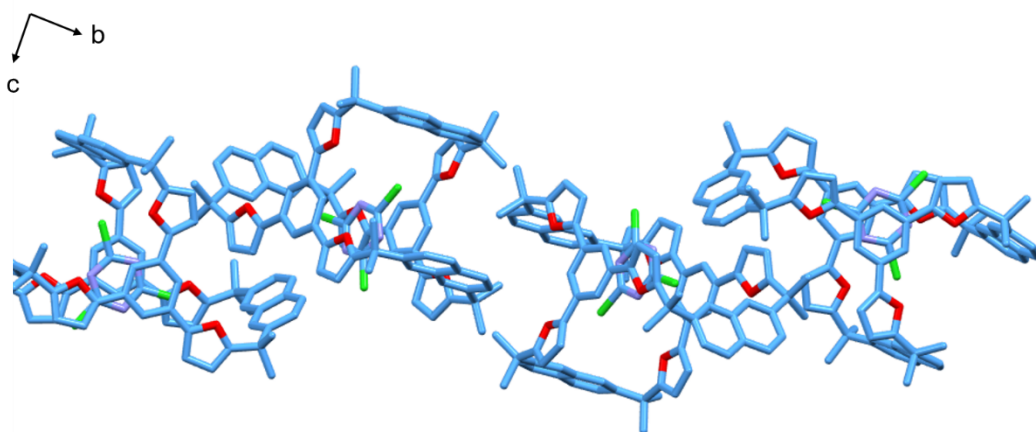

**Figure S65.** Illustration of packing mode of **G6c-FPC**.

**Table 4. Crystal data and structure refinement for Single-Crystal (G6C-FPC)**

---

|                                             |                                                                               |
|---------------------------------------------|-------------------------------------------------------------------------------|
| Empirical formula                           | C <sub>87</sub> H <sub>72</sub> Cl <sub>3</sub> N <sub>3</sub> O <sub>6</sub> |
| Formula weight                              | 1361.82                                                                       |
| Temperature/K                               | 170.00                                                                        |
| Crystal system                              | monoclinic                                                                    |
| Space group                                 | P2 <sub>1</sub> /c                                                            |
| a/Å                                         | 13.0442(3)                                                                    |
| b/Å                                         | 45.4447(11)                                                                   |
| c/Å                                         | 12.4711(3)                                                                    |
| $\alpha$ /°                                 | 90                                                                            |
| $\beta$ /°                                  | 105.2980(10)                                                                  |
| $\gamma$ /°                                 | 90                                                                            |
| Volume/Å <sup>3</sup>                       | 7130.8(3)                                                                     |
| Z                                           | 4                                                                             |
| $\rho_{\text{calc}}/\text{cm}^3$            | 1.269                                                                         |
| $\mu/\text{mm}^{-1}$                        | 1.065                                                                         |
| F(000)                                      | 2856.0                                                                        |
| Crystal size/mm <sup>3</sup>                | 0.17 × 0.17 × 0.05                                                            |
| Radiation                                   | GaK $\alpha$ ( $\lambda$ = 1.34139)                                           |
| 2 $\theta$ range for data collection/°      | 6.112 to 109.908                                                              |
| Index ranges                                | -15 ≤ h ≤ 15, -55 ≤ k ≤ 55, -15 ≤ l ≤ 14                                      |
| Reflections collected                       | 166835                                                                        |
| Independent reflections                     | 13544 [R <sub>int</sub> = 0.0835, R <sub>sigma</sub> = 0.0365]                |
| Data/restraints/parameters                  | 13544/0/904                                                                   |
| Goodness-of-fit on F <sup>2</sup>           | 1.034                                                                         |
| Final R indexes [I ≥ 2 $\sigma$ (I)]        | R <sub>1</sub> = 0.0557, wR <sub>2</sub> = 0.1375                             |
| Final R indexes [all data]                  | R <sub>1</sub> = 0.0820, wR <sub>2</sub> = 0.1548                             |
| Largest diff. peak/hole / e Å <sup>-3</sup> | 0.41/-0.66                                                                    |
| CCDC number                                 | 2422478                                                                       |

---

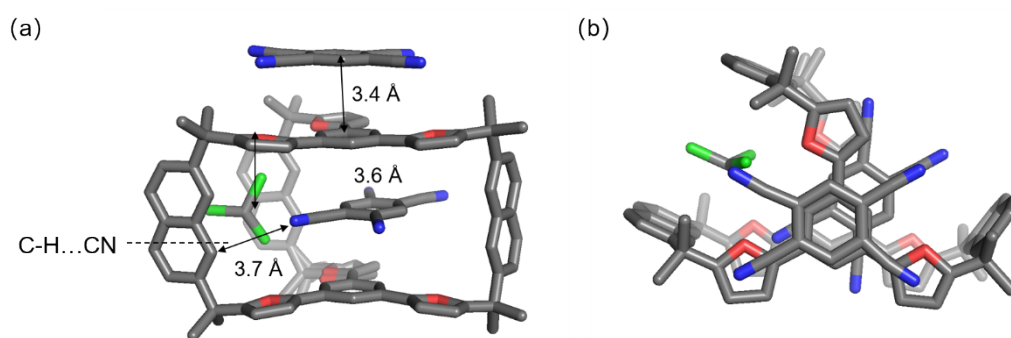

**Figure S66.** (a) Side view of the single crystal structure of the complex **G1⊂FPC**. The existence of  $\pi \dots \pi$  interactions between guests and TPB planes and hydrogen bonds between guests and aromatic hydrogens are labelled. (b) Top view of the complex, which shows slightly distortion due to the hydrogen bonds.

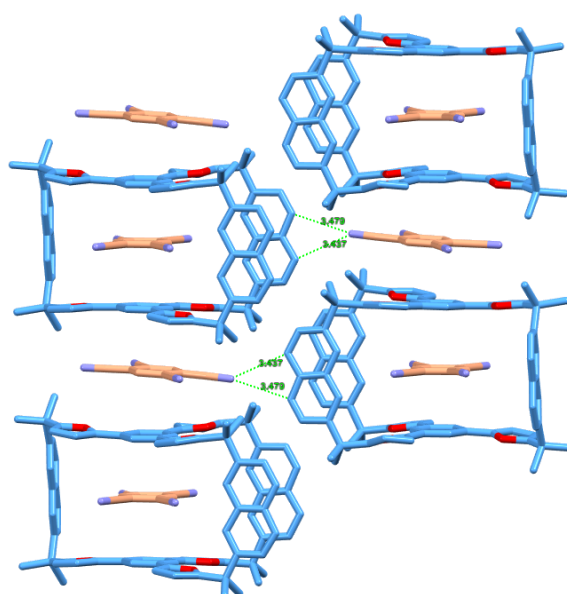

**Figure S67.** Illustration of various C-H $\cdots$ N hydrogen bonds between adjacent units in the crystal structure of the complex **G1⊂FPC**.

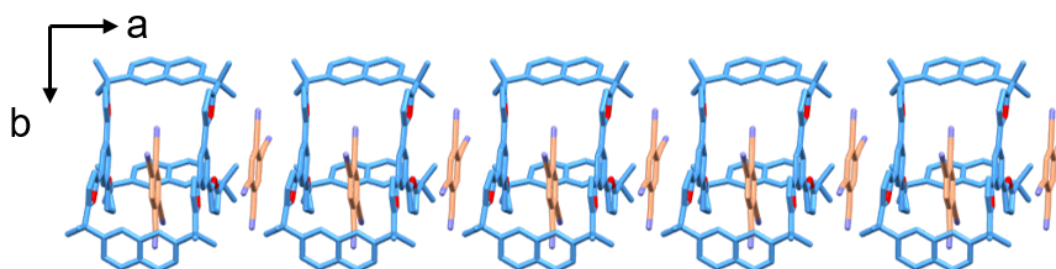

**Figure S68.** Illustration of the “sandwich”-like superstructure in the *ab* plane, revealing an arrayed arrangement arising from  $\pi \dots \pi$  interactions with a 1:2 host-guest ratio in the crystal structure of the complex **G1⊂FPC**. For clarity, hydrogen atoms and  $\text{CHCl}_3$  molecules have been omitted.

**Table 5. Crystal data and structure refinement for Single-Crystal (G1cFPC)**

---

|                                             |                                                                                 |
|---------------------------------------------|---------------------------------------------------------------------------------|
| Empirical formula                           | C <sub>108</sub> H <sub>82</sub> Cl <sub>12</sub> N <sub>8</sub> O <sub>6</sub> |
| Formula weight                              | 2013.21                                                                         |
| Temperature/K                               | 170.00                                                                          |
| Crystal system                              | triclinic                                                                       |
| Space group                                 | P-1                                                                             |
| a/Å                                         | 13.530(3)                                                                       |
| b/Å                                         | 17.329(3)                                                                       |
| c/Å                                         | 22.136(4)                                                                       |
| $\alpha$ /°                                 | 106.899(5)                                                                      |
| $\beta$ /°                                  | 98.618(4)                                                                       |
| $\gamma$ /°                                 | 91.523(6)                                                                       |
| Volume/Å <sup>3</sup>                       | 4896.2(16)                                                                      |
| Z                                           | 2                                                                               |
| $\rho_{\text{calc}}/\text{cm}^3$            | 1.366                                                                           |
| $\mu/\text{mm}^{-1}$                        | 2.421                                                                           |
| F(000)                                      | 2076.0                                                                          |
| Crystal size/mm <sup>3</sup>                | 0.1 × 0.06 × 0.03                                                               |
| Radiation                                   | GaK $\alpha$ ( $\lambda = 1.34139$ )                                            |
| 2 $\theta$ range for data collection/°      | 6.308 to 98.298                                                                 |
| Index ranges                                | -15 ≤ h ≤ 14, -19 ≤ k ≤ 19, -24 ≤ l ≤ 20                                        |
| Reflections collected                       | 32644                                                                           |
| Independent reflections                     | 14408 [R <sub>int</sub> = 0.0879, R <sub>sigma</sub> = 0.1486]                  |
| Data/restraints/parameters                  | 14408/454/1174                                                                  |
| Goodness-of-fit on F <sup>2</sup>           | 1.034                                                                           |
| Final R indexes [I ≥ 2 $\sigma$ (I)]        | R <sub>1</sub> = 0.1197, wR <sub>2</sub> = 0.3164                               |
| Final R indexes [all data]                  | R <sub>1</sub> = 0.2332, wR <sub>2</sub> = 0.3950                               |
| Largest diff. peak/hole / e Å <sup>-3</sup> | 1.15/-0.49                                                                      |
| CCDC                                        | 2497980                                                                         |

---

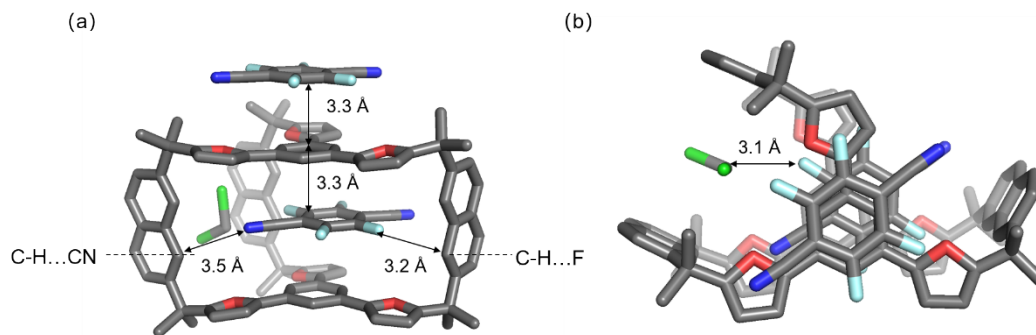

**Figure S69.** (a) Side view of the single crystal structure of the complex **G2cFPC**. The existence of  $\pi \dots \pi$  interactions between guests and TPB planes and hydrogen bonds between guests and aromatic hydrogens are labelled. (b) Top view of the complex, which shows distortion due to the hydrogen bonds.

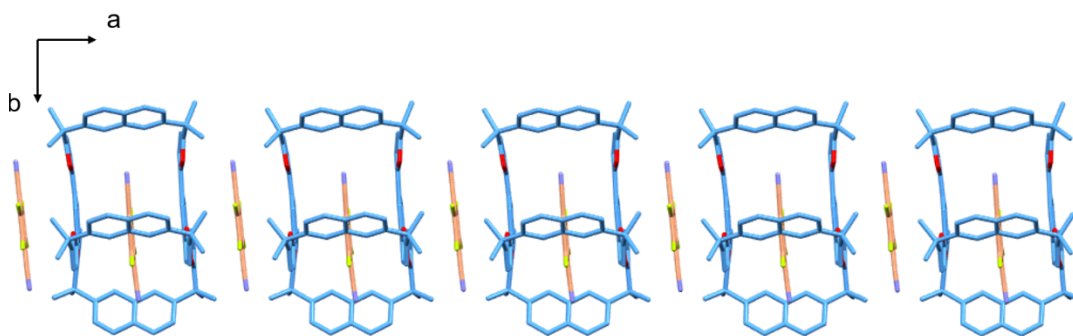

**Figure S70.** Illustration of the “sandwich”-like superstructure in the  $ab$  plane, revealing an arrayed arrangement arising from  $\pi \dots \pi$  interactions with a 1:2 host–guest ratio in the crystal structure of the complex **G2cFPC**. For clarity, hydrogen atoms and DCM molecules have been omitted.

**Table 6. Crystal data and structure refinement for Single-Crystal (G2cFPC)**

---

|                                             |                                                                                               |
|---------------------------------------------|-----------------------------------------------------------------------------------------------|
| Empirical formula                           | C <sub>101</sub> H <sub>73</sub> Cl <sub>2</sub> F <sub>8</sub> N <sub>4</sub> O <sub>6</sub> |
| Formula weight                              | 1661.53                                                                                       |
| Temperature/K                               | 170.00                                                                                        |
| Crystal system                              | triclinic                                                                                     |
| Space group                                 | P-1                                                                                           |
| a/Å                                         | 13.4122(13)                                                                                   |
| b/Å                                         | 17.5105(17)                                                                                   |
| c/Å                                         | 21.7230(17)                                                                                   |
| α/°                                         | 71.301(3)                                                                                     |
| β/°                                         | 82.345(4)                                                                                     |
| γ/°                                         | 85.423(4)                                                                                     |
| Volume/Å <sup>3</sup>                       | 4785.6(8)                                                                                     |
| Z                                           | 2                                                                                             |
| ρ <sub>calc</sub> /cm <sup>3</sup>          | 1.153                                                                                         |
| μ/mm <sup>-1</sup>                          | 0.784                                                                                         |
| F(000)                                      | 1722.0                                                                                        |
| Crystal size/mm <sup>3</sup>                | 0.26 × 0.03 × 0.03                                                                            |
| Radiation                                   | GaKα (λ = 1.34139)                                                                            |
| 2θ range for data collection/°              | 5.788 to 105                                                                                  |
| Index ranges                                | -14 ≤ h ≤ 15, -20 ≤ k ≤ 20, -25 ≤ l ≤ 25                                                      |
| Reflections collected                       | 50363                                                                                         |
| Independent reflections                     | 16253 [R <sub>int</sub> = 0.0888, R <sub>sigma</sub> = 0.1322]                                |
| Data/restraints/parameters                  | 16253/1/1102                                                                                  |
| Goodness-of-fit on F <sup>2</sup>           | 0.984                                                                                         |
| Final R indexes [I ≥ 2σ (I)]                | R <sub>1</sub> = 0.0876, wR <sub>2</sub> = 0.2399                                             |
| Final R indexes [all data]                  | R <sub>1</sub> = 0.1610, wR <sub>2</sub> = 0.2957                                             |
| Largest diff. peak/hole / e Å <sup>-3</sup> | 0.47/-0.53                                                                                    |
| CCDC                                        | 2501604                                                                                       |

---

## 6. Job-Plot Analysis of Typical Host-Guest complexes.

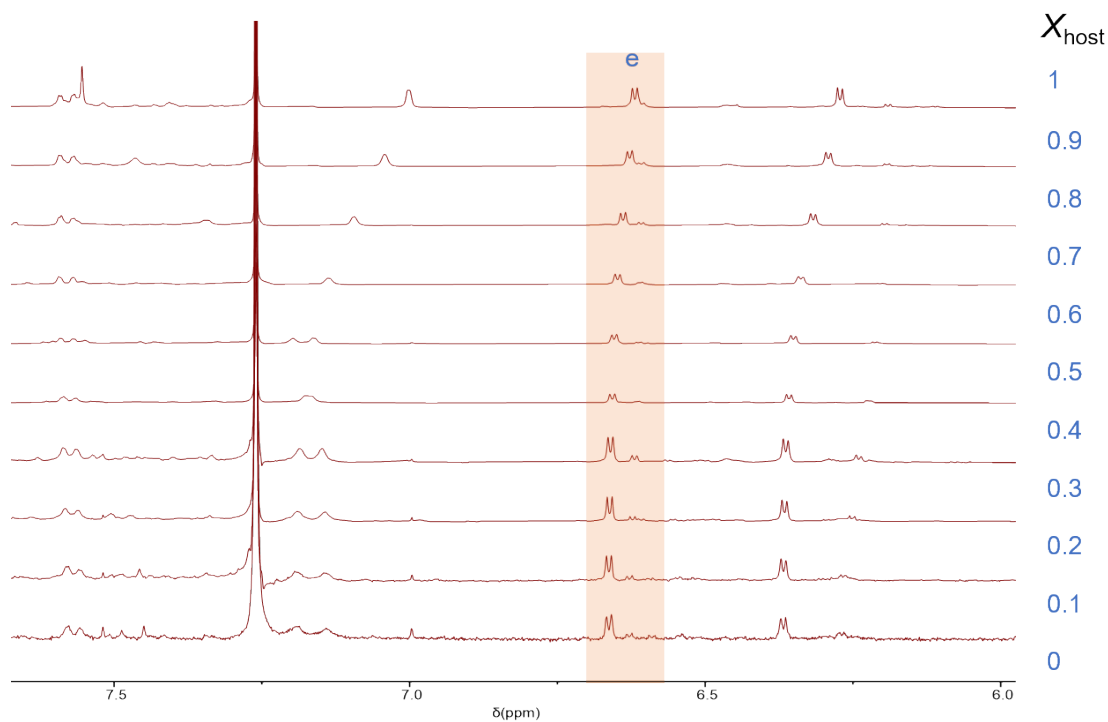

**Figure S71.**  $^1\text{H}$  NMR spectra (400 MHz,  $\text{CDCl}_3$ , 298 K) of FPC in the presence of different amounts of G1.  $[\text{G1}] + [\text{FPC}] = 2.8$  mM for all spectra. The  $\Delta\delta$  of the proton  $\text{H}_e$  was used to make the Job plot.

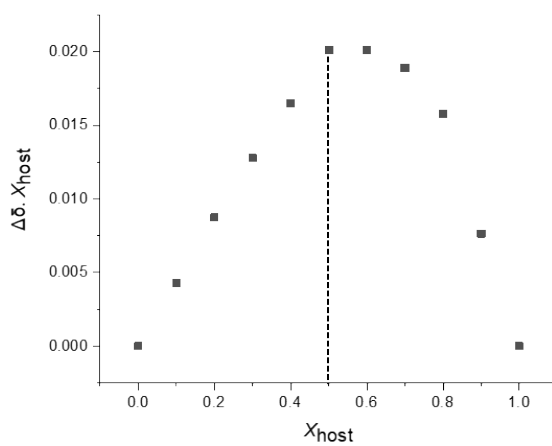

**Figure S72.** A Job plot of  $\Delta\delta \cdot X_{\text{host}}$  versus  $X_{\text{host}}$ , based on the results in Figure S71.

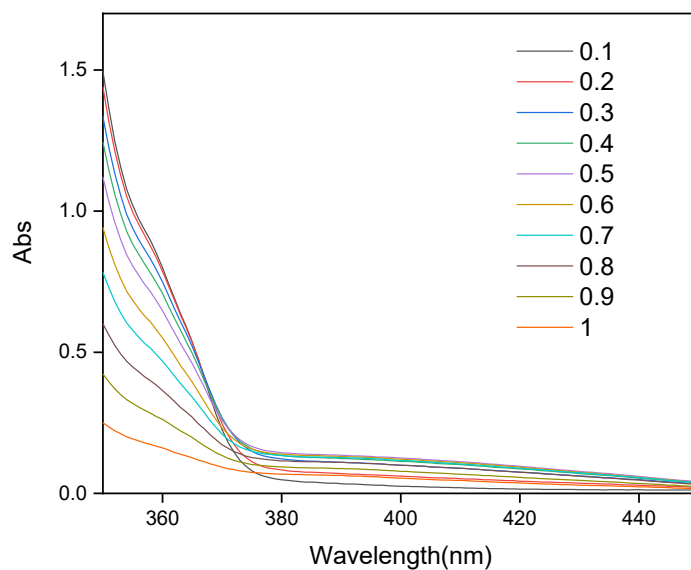

**Figure S73.** UV-vis spectra of **FPC** in the presence of varying amounts of **G2** were recorded while maintaining a constant total concentration ( $[\mathbf{G2}] + [\mathbf{FPC}] = 1.0 \text{ mM}$ ). The mole fraction of **FPC** was varied from 0 to 1. The changes in absorbance ( $\Delta A$ ) at the characteristic charge-transfer band were used to construct the Job plot.

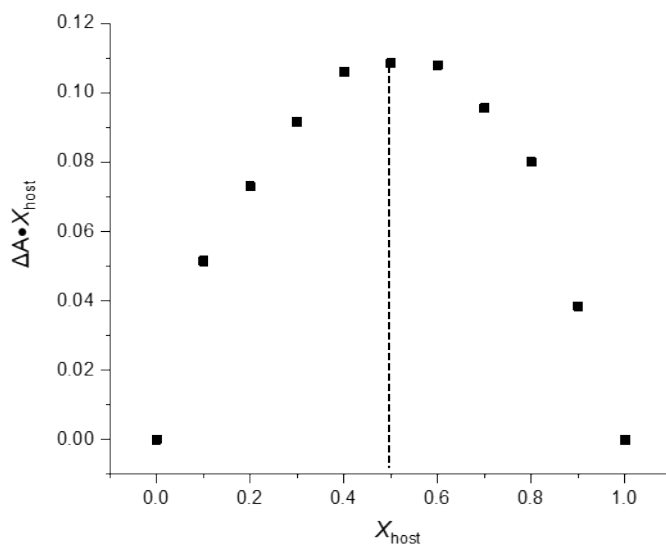

**Figure S74.** A Job plot of  $\Delta A \cdot X_{\text{host}}$  versus  $X_{\text{host}}$ , based on the results in Figure S73.

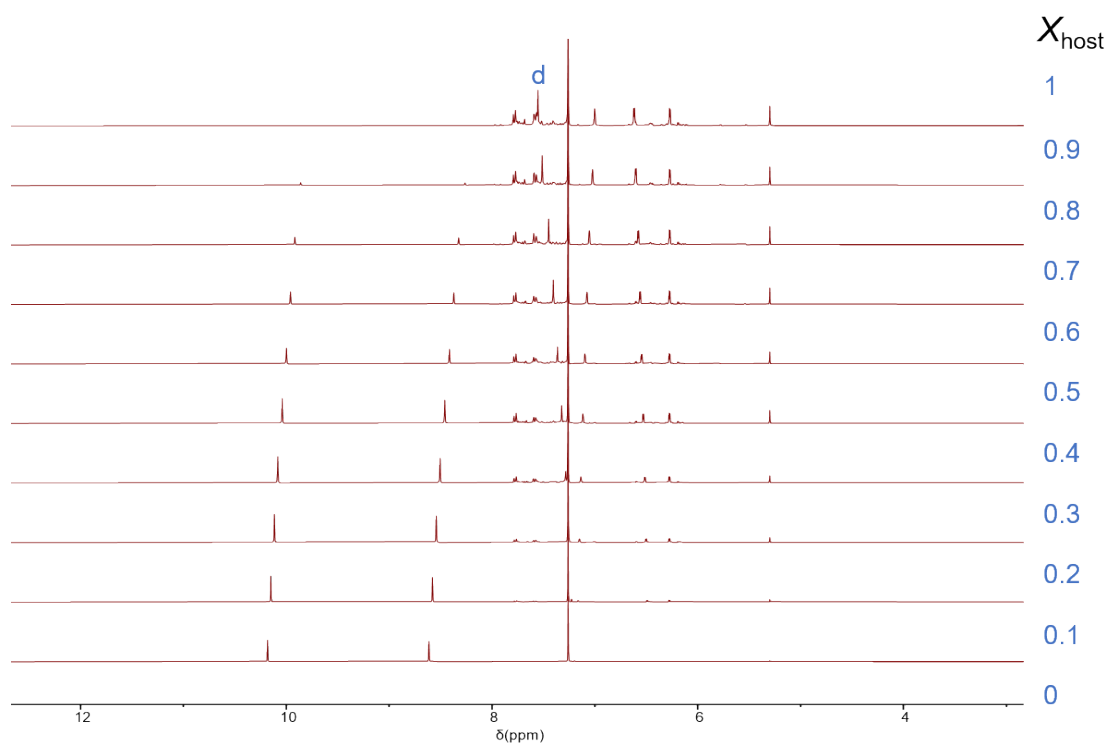

**Figure S75.**  $^1\text{H}$  NMR spectra (400 MHz,  $\text{CDCl}_3$ , 298 K) of FPC in the presence of different amounts of G5.  $[\text{G5}] + [\text{FPC}] = 3 \text{ mM}$  for all spectra. The  $\Delta\delta$  of the proton  $\text{H}_d$  was used to make the Job plot.

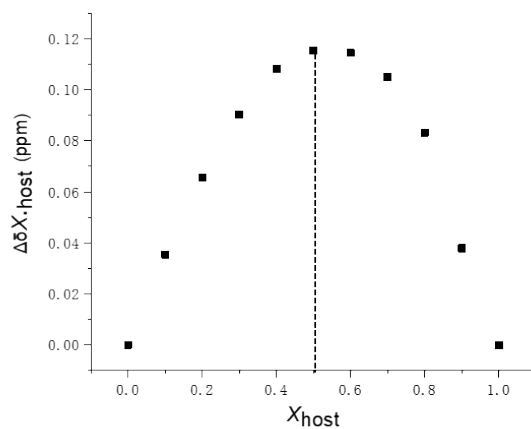

**Figure S76.** A Job plot of  $\Delta\delta \cdot X_{\text{host}}$  versus  $X_{\text{host}}$ , based on the results in Figure S75.

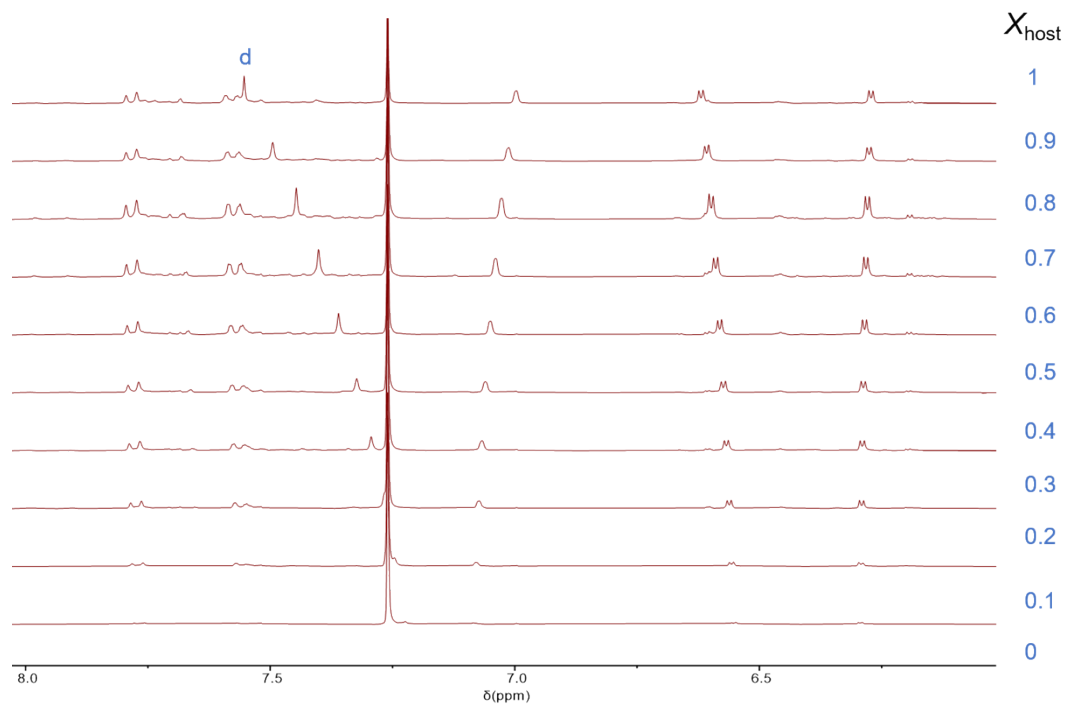

**Figure S77.**  $^1\text{H}$  NMR spectra (400 MHz,  $\text{CDCl}_3$ , 298 K) of **FPC** in the presence of different amounts of **G4**.  $[\text{G4}] + [\text{FPC}] = 3 \text{ mM}$  for all spectra. The  $\Delta\delta$  of the proton  $\text{H}_d$  was used to make the Job plot.

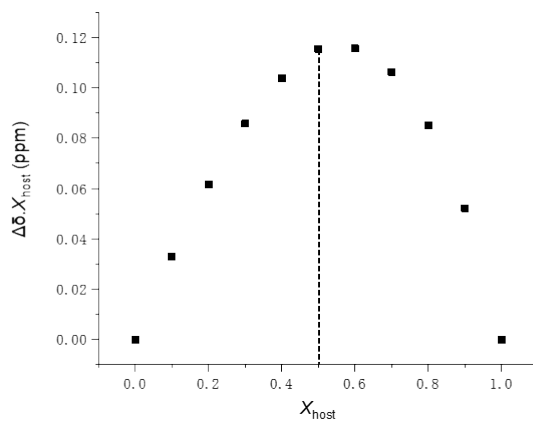

**Figure S78.** A Job plot of  $\Delta\delta \cdot X_{\text{host}}$  versus  $X_{\text{host}}$ , based on the results in Figure S77.

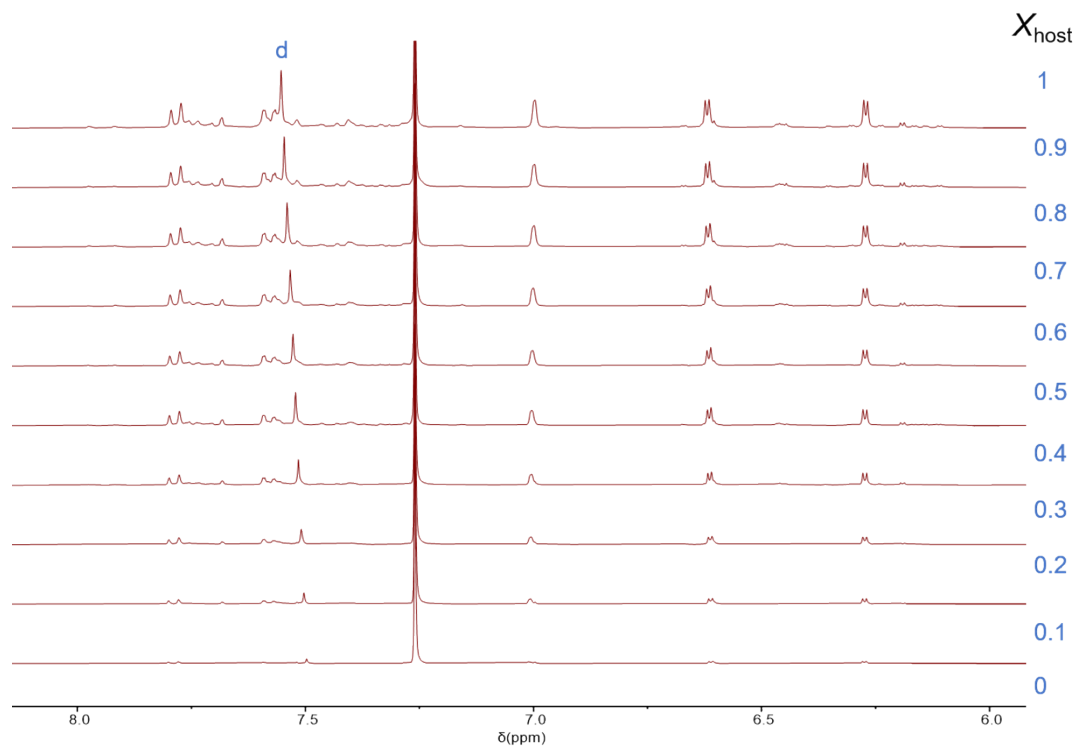

**Figure S79.**  $^1\text{H}$  NMR spectra (400 MHz,  $\text{CDCl}_3$ , 298 K) of **FPC** in the presence of different amounts of **G6**.  $[\text{G6}] + [\text{FPC}] = 3 \text{ mM}$  for all spectra. The  $\Delta\delta$  of the proton  $\text{H}_d$  was used to make the Job plot.

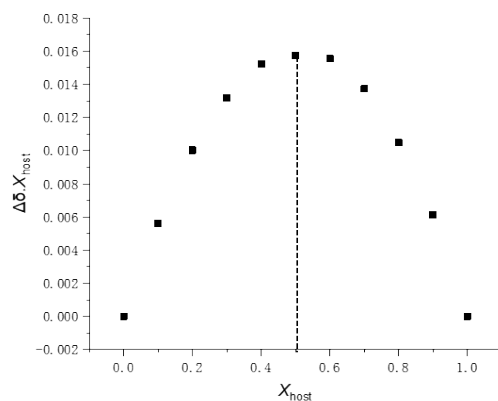

**Figure S80.** A Job plot of  $\Delta\delta \cdot X_{\text{host}}$  versus  $X_{\text{host}}$ , based on the results in Figure S77.

## 7. Vapochromic behaviors of complex G1c FPC.

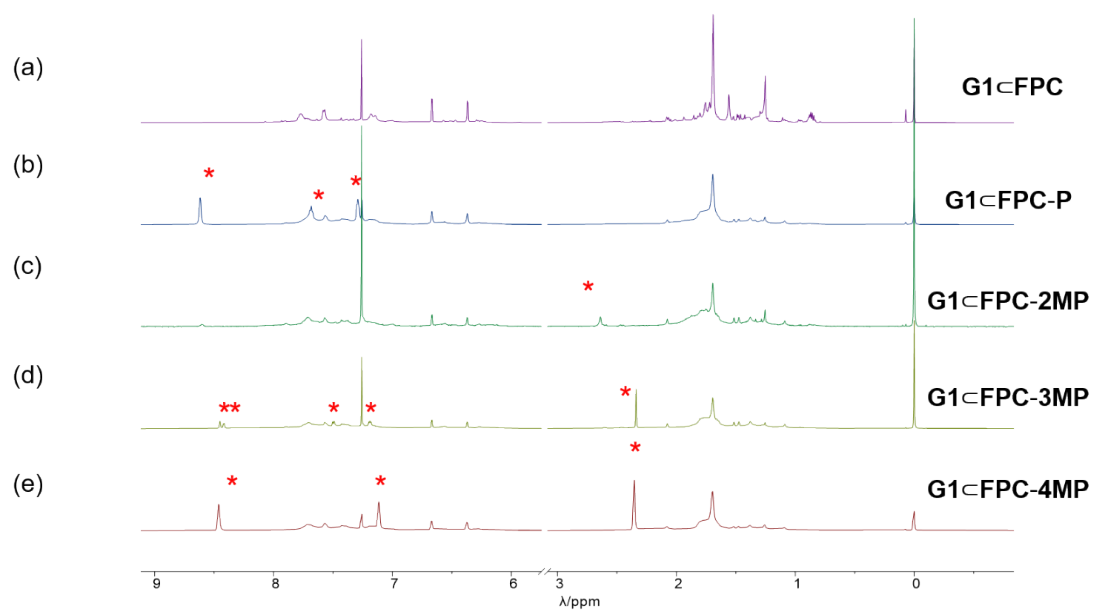

**Figure S81.** Partial <sup>1</sup>H NMR (298 K, 600 MHz, CDCl<sub>3</sub>) of (a) G1c FPC (b) G1c FPC-P (c) G1c FPC-2MP (d) G1c FPC-3MP and (e) G1c FPC-4MP.

## 8. Reference.

[S1] Zhu, D.; Sun, B.; Tong, L.; Wu, Y.; Cetin, M. M.; Li, H. A  $\pi$ -Electron Rich Cage via the Friedel-Crafts Reaction. *Org Lett*, **24**, 8980-8985 (2022).

[S2] Computational details

All the DFT calculations were performed with ORCA program [<https://doi.org/10.1002/wcms.81> <https://doi.org/10.1002/wcms.70019>]. For geometry optimization and frequency analysis we adopted the hybrid functional by using the B3LYP [<https://doi.org/10.1063/1.464913> <https://doi.org/10.1103/PhysRevB.37.785>] with DFT-D3BJ dispersion correction [<https://doi.org/10.1063/1.3382344> <https://doi.org/10.1002/jcc.21759>]. During geometry optimization we used the valence triple- $\zeta$  basis set def-TZVP [<https://doi.org/10.1039/B508541A>] for all atoms. To refine the computed orbital energy, single point calculations were performed using the range-separated hybrid functional  $\omega$ B97M-V [<https://doi.org/10.1063/1.4952647>] and the def2-TZVPP [<https://doi.org/10.1039/B508541A>] basis set. Electrostatic potential figures were generated using Multiwfn [<https://doi.org/10.1002/jcc.22885> <https://doi.org/10.1063/5.0216272> <https://doi.org/10.1039/D1CP02805G>] to produce cube files, and visualised with VMD [[https://doi.org/10.1016/0263-7855\(96\)00018-5](https://doi.org/10.1016/0263-7855(96)00018-5)].
